# Supplementary material
Source: PubMed Central journal article supplement (PMC3666579)
Supplement: NIHMS463034-supplement-1_si_001.pdf [file NIHMS463034-supplement-1_si_001.pdf]

**Supporting Information for**

**Thiophene-Core Estrogen Receptor Ligands Having Superagonist Activity**

Jian Min, Pengcheng Wang, Sathish Srinivasan, Jerome C. Nwachukwu, Pu Guo, Minjian Huang, Kathryn E. Carlson, John A. Katzenellenbogen,\* Kendall W. Nettles, and Hai-Bing Zhou\*

**TABLE OF CONTENTS**

|                                                          |            |
|----------------------------------------------------------|------------|
| <b>PART I. SUMMARY OF HPLC RESULTS .....</b>             | <b>S2</b>  |
| <b>PART II. HPLC CHROMATOGRAMS.....</b>                  | <b>S4</b>  |
| <b>PART III. BIOLOGICAL ASSAYS FOR COMPOUND 10a.....</b> | <b>S44</b> |

## PART I. SUMMARY OF HPLC RESULTS

| Cmpd | Normal Phase    | Ret. Time | %Purity  | Reverse Phase                             | Ret. Time | %Purity  |
|------|-----------------|-----------|----------|-------------------------------------------|-----------|----------|
| 2a   | 30:70 EtOAc:Hex | 4.863     | 100.0000 | 70:30 CH <sub>3</sub> CN:H <sub>2</sub> O | 4.217     | 100.0000 |
| 2b   | 30:70 EtOAc:Hex | 3.763     | 97.7655  | 70:30 CH <sub>3</sub> CN:H <sub>2</sub> O | 4.515     | 98.1484  |
| 2c   | 30:70 EtOAc:Hex | 3.120     | 96.8973  | 70:30 CH <sub>3</sub> CN:H <sub>2</sub> O | 5.618     | 96.6949  |
| 2d   | 30:70 EtOAc:Hex | 3.248     | 98.1529  | 70:30 CH <sub>3</sub> CN:H <sub>2</sub> O | 5.968     | 98.9121  |
| 2e   | 30:70 EtOAc:Hex | 5.498     | 98.5124  | 70:30 CH <sub>3</sub> CN:H <sub>2</sub> O | 4.347     | 100.0000 |
| 2f   | 30:70 EtOAc:Hex | 4.990     | 100.0000 | 70:30 CH <sub>3</sub> CN:H <sub>2</sub> O | 4.007     | 100.0000 |
| 2g   | 30:70 EtOAc:Hex | 4.797     | 99.3402  | 70:30 CH <sub>3</sub> CN:H <sub>2</sub> O | 5.975     | 96.8976  |
| 2h   | 30:70 EtOAc:Hex | 4.790     | 98.1834  | 70:30 CH <sub>3</sub> CN:H <sub>2</sub> O | 5.343     | 97.7597  |
| 2i   | 30:70 EtOAc:Hex | 3.747     | 99.0071  | 70:30 CH <sub>3</sub> CN:H <sub>2</sub> O | 5.200     | 95.8788  |
| 2j   | 30:70 EtOAc:Hex | 4.805     | 100.0000 | 70:30 CH <sub>3</sub> CN:H <sub>2</sub> O | 4.298     | 100.0000 |
| 2k   | 30:70 EtOAc:Hex | 4.298     | 98.9884  | 70:30 CH <sub>3</sub> CN:H <sub>2</sub> O | 4.518     | 100.0000 |
| 2l   | 30:70 EtOAc:Hex | 3.223     | 97.7352  | 70:30 CH <sub>3</sub> CN:H <sub>2</sub> O | 5.802     | 98.2713  |
| 2m   | 30:70 EtOAc:Hex | 3.838     | 95.6289  | 70:30 CH <sub>3</sub> CN:H <sub>2</sub> O | 5.127     | 100.0000 |
| 4a   | 30:70 EtOAc:Hex | 3.435     | 95.6272  | 70:30 CH <sub>3</sub> CN:H <sub>2</sub> O | 3.858     | 98.0512  |
| 4b   | 30:70 EtOAc:Hex | 3.670     | 96.6890  | 70:30 CH <sub>3</sub> CN:H <sub>2</sub> O | 5.147     | 99.7345  |
| 4c   | 30:70 EtOAc:Hex | 4.508     | 97.3305  | 70:30 CH <sub>3</sub> CN:H <sub>2</sub> O | 5.138     | 99.4313  |
| 4d   | 30:70 EtOAc:Hex | 3.435     | 95.0513  | 70:30 CH <sub>3</sub> CN:H <sub>2</sub> O | 7.262     | 98.1410  |
| 4e   | 30:70 EtOAc:Hex | 4.797     | 99.3787  | 70:30 CH <sub>3</sub> CN:H <sub>2</sub> O | 4.518     | 100.0000 |
| 4f   | 30:70 EtOAc:Hex | 5.802     | 99.2925  | 70:30 CH <sub>3</sub> CN:H <sub>2</sub> O | 4.502     | 100.0000 |
| 6a   | 30:70 EtOAc:Hex | 5.653     | 99.7312  | 70:30 CH <sub>3</sub> CN:H <sub>2</sub> O | 4.368     | 100.0000 |
| 6b   | 30:70 EtOAc:Hex | 5.392     | 100.0000 | 70:30 CH <sub>3</sub> CN:H <sub>2</sub> O | 4.312     | 99.0518  |
| 8a   | 30:70 EtOAc:Hex | 5.598     | 99.5308  | 70:30 CH <sub>3</sub> CN:H <sub>2</sub> O | 4.332     | 100.0000 |
| 8b   | 30:70 EtOAc:Hex | 4.625     | 98.6786  | 70:30 CH <sub>3</sub> CN:H <sub>2</sub> O | 4.590     | 100.0000 |
| 10a  | 30:70 EtOAc:Hex | 4.848     | 100.0000 | 70:30 CH <sub>3</sub> CN:H <sub>2</sub> O | 4.217     | 100.0000 |
| 10b  | 30:70 EtOAc:Hex | 4.442     | 97.4312  | 70:30 CH <sub>3</sub> CN:H <sub>2</sub> O | 4.258     | 98.9578  |
| 10c  | 30:70 EtOAc:Hex | 4.417     | 100.0000 | 70:30 CH <sub>3</sub> CN:H <sub>2</sub> O | 4.522     | 100.0000 |
| 10d  | 30:70 EtOAc:Hex | 5.582     | 100.0000 | 70:30 CH <sub>3</sub> CN:H <sub>2</sub> O | 4.893     | 100.0000 |

| Cmpd | Normal Phase    | Ret. Time | %Purity  | Reverse Phase                             | Ret. Time | %Purity  |
|------|-----------------|-----------|----------|-------------------------------------------|-----------|----------|
| 12a  | 30:70 EtOAc:Hex | 5.037     | 100.0000 | 70:30 CH <sub>3</sub> CN:H <sub>2</sub> O | 4.243     | 100.0000 |
| 12b  | 30:70 EtOAc:Hex | 4.920     | 100.0000 | 70:30 CH <sub>3</sub> CN:H <sub>2</sub> O | 4.097     | 100.0000 |
| 14a  | 30:70 EtOAc:Hex | 5.542     | 95.2782  | 70:30 CH <sub>3</sub> CN:H <sub>2</sub> O | 3.575     | 98.0363  |
| 14b  | 30:70 EtOAc:Hex | 6.112     | 98.0220  | 70:30 CH <sub>3</sub> CN:H <sub>2</sub> O | 4.138     | 98.0481  |
| 14c  | 30:70 EtOAc:Hex | 7.123     | 97.9189  | 70:30 CH <sub>3</sub> CN:H <sub>2</sub> O | 3.665     | 100.0000 |
| 16a  | 30:70 EtOAc:Hex | 3.748     | 97.8027  | 70:30 CH <sub>3</sub> CN:H <sub>2</sub> O | 4.768     | 97.7940  |
| 16b  | 30:70 EtOAc:Hex | 4.625     | 99.5229  | 70:30 CH <sub>3</sub> CN:H <sub>2</sub> O | 4.238     | 100.0000 |
| 16c  | 30:70 EtOAc:Hex | 5.612     | 96.3286  | 70:30 CH <sub>3</sub> CN:H <sub>2</sub> O | 4.787     | 95.6711  |
| 16d  | 30:70 EtOAc:Hex | 3.223     | 97.2168  | 70:30 CH <sub>3</sub> CN:H <sub>2</sub> O | 4.525     | 96.9878  |
| 18a  | 30:70 EtOAc:Hex | 4.205     | 97.6740  | 70:30 CH <sub>3</sub> CN:H <sub>2</sub> O | 4.398     | 99.0805  |
| 18b  | 30:70 EtOAc:Hex | 5.710     | 100.0000 | 70:30 CH <sub>3</sub> CN:H <sub>2</sub> O | 3.815     | 100.0000 |
| 18c  | 30:70 EtOAc:Hex | 4.403     | 98.1523  | 70:30 CH <sub>3</sub> CN:H <sub>2</sub> O | 4.220     | 96.1641  |
| 18d  | 30:70 EtOAc:Hex | 5.103     | 100.0000 | 70:30 CH <sub>3</sub> CN:H <sub>2</sub> O | 4.245     | 100.0000 |

## PART II. HPLC CHROMATOGRAMS

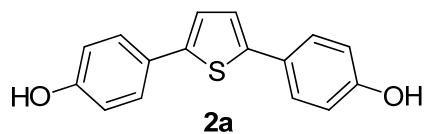

Normal Phase(Method 30:70 EtOAc:Hex, Flow rate 1.0 mL/min)

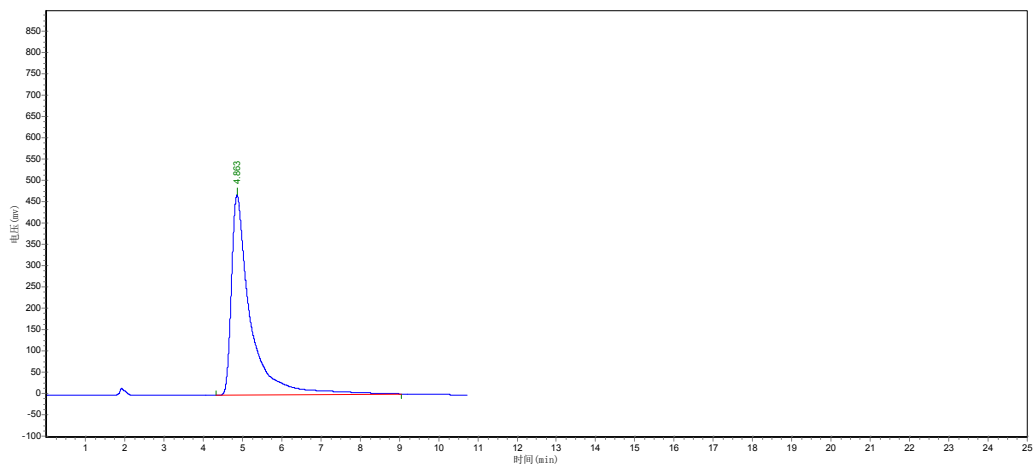

| Name   | Retention Time | Peak height | Area         | Area Percent |
|--------|----------------|-------------|--------------|--------------|
| Totals | 4.863          | 469622.594  | 15815037.000 | 100.0000     |

Reverse Phase(Method 70:30 CH<sub>3</sub>CN:H<sub>2</sub>O, Flow rate 0.7 mL/min)

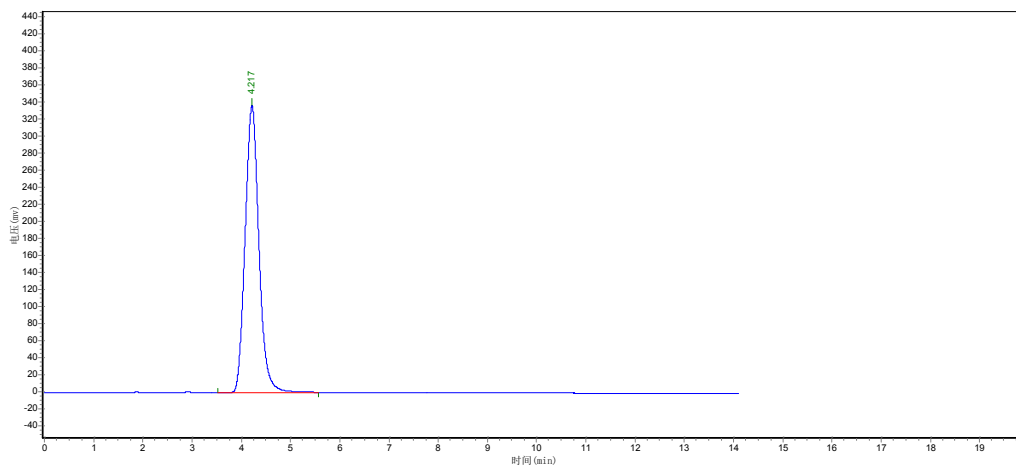

| Name   | Retention Time | Peak height | Area        | Area Percent |
|--------|----------------|-------------|-------------|--------------|
| Totals | 4.217          | 336381.563  | 6547481.000 | 100.0000     |

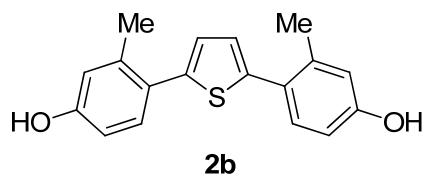

Normal Phase(Method 30:70 EtOAc:Hex, Flow rate 1.0 mL/min)

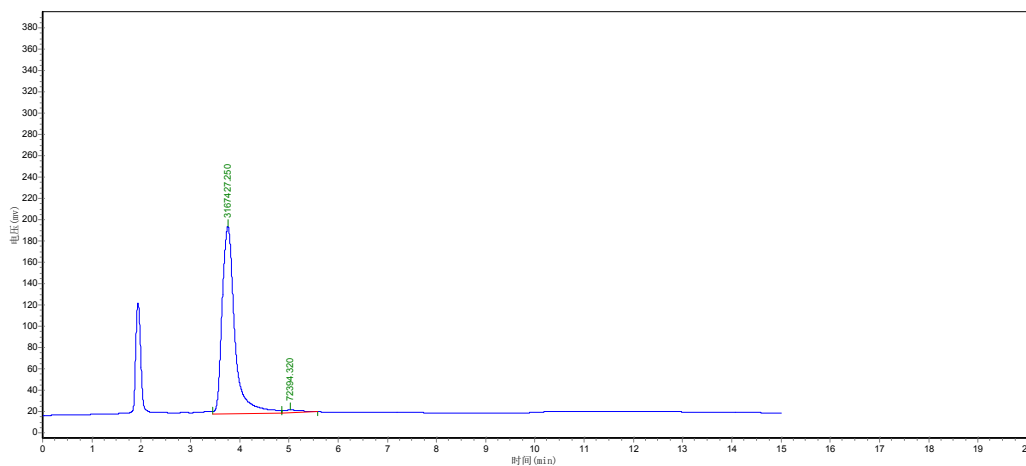

| Name   | Retention Time | Peak height | Area        | Area Percent |
|--------|----------------|-------------|-------------|--------------|
|        | 3.763          | 175996.281  | 3167427.250 | 97.7655      |
|        | 5.035          | 2725.632    | 72394.320   | 2.2345       |
| Totals |                | 178721.913  | 3239821.570 | 100.0000     |

Reverse Phase(Method 70:30 CH<sub>3</sub>CN:H<sub>2</sub>O, Flow rate 0.7 mL/min)

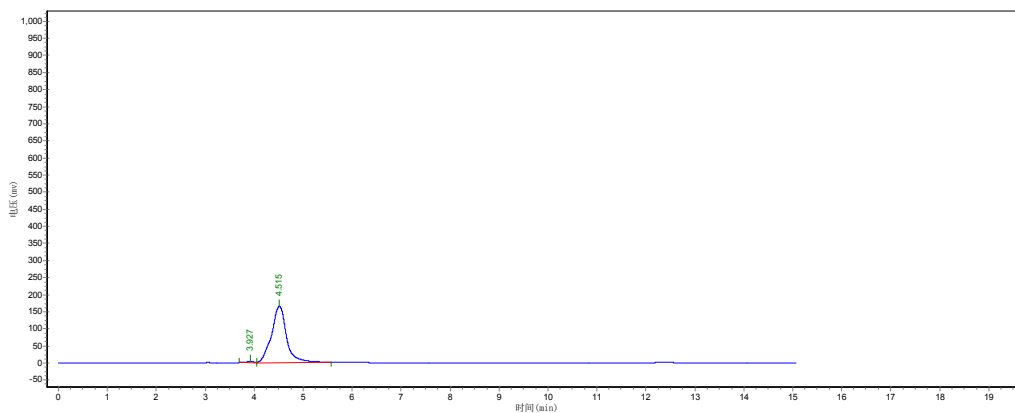

| Name   | Retention Time | Peak height | Area        | Area Percent |
|--------|----------------|-------------|-------------|--------------|
|        | 3.927          | 4029.172    | 65529.375   | 1.8516       |
|        | 4.515          | 164671.750  | 3473528.500 | 98.1484      |
| Totals |                | 168700.922  | 3539057.875 | 100.0000     |

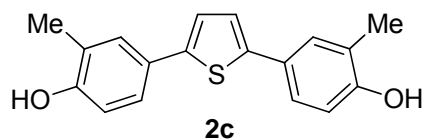

Normal Phase(Method 30:70 EtOAc:Hex, Flow rate 1.0 mL/min)

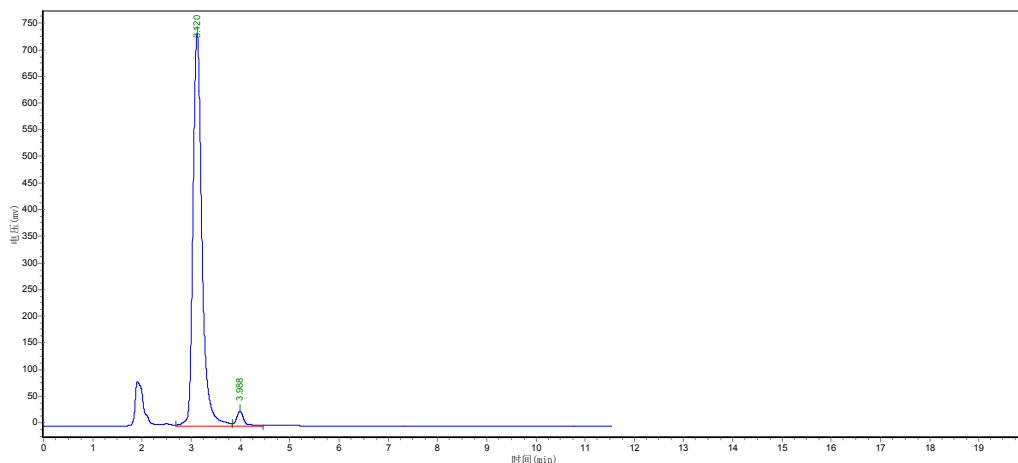

| Name   | Retention Time | Peak height | Area        | Area Percent |
|--------|----------------|-------------|-------------|--------------|
|        | 3.120          | 737009.563  | 9326274.000 | 96.8973      |
|        | 3.988          | 27344.520   | 298628.000  | 3.1027       |
| Totals |                | 764354.082  | 9624902.000 | 100.0000     |

Reverse Phase(Method 70:30 CH<sub>3</sub>CN:H<sub>2</sub>O, Flow rate 0.7 mL/min)

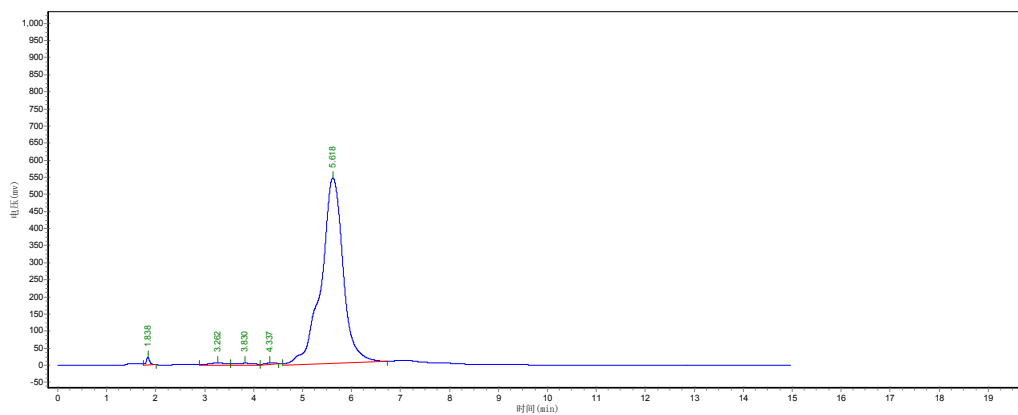

| Name   | Retention Time | Peak height | Area         | Area Percent |
|--------|----------------|-------------|--------------|--------------|
|        | 1.838          | 23930.510   | 120391.617   | 0.6881       |
|        | 3.262          | 8299.011    | 202101.453   | 1.1550       |
|        | 3.830          | 6317.469    | 190425.531   | 1.0883       |
|        | 4.337          | 4104.927    | 65385.520    | 0.3737       |
|        | 5.618          | 543700.625  | 16919074.000 | 96.6949      |
| Totals |                | 586352.542  | 17497378.121 | 100.0000     |

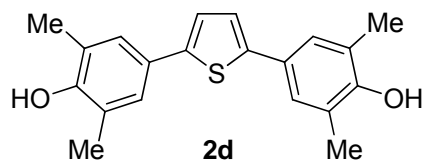

Normal Phase(Method 30:70 EtOAc:Hex, Flow rate 1.0 mL/min)

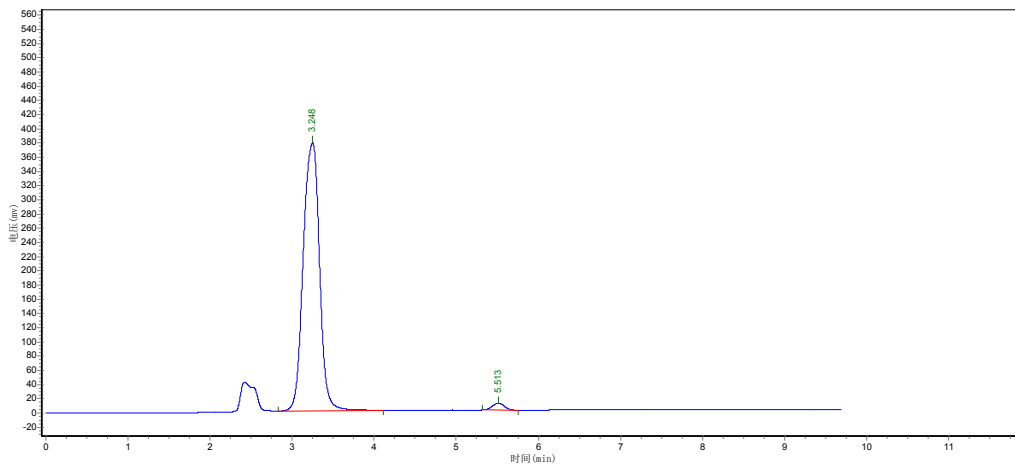

| Name   | Retention Time | Peak height | Area        | Area Percent |
|--------|----------------|-------------|-------------|--------------|
|        | 3.248          | 377613.344  | 5237528.000 | 98.1529      |
|        | 5.513          | 9491.735    | 98560.797   | 1.8471       |
| Totals |                | 387105.079  | 5336088.797 | 100.0000     |

Reverse Phase(Method 70:30 CH<sub>3</sub>CN:H<sub>2</sub>O, Flow rate 0.7 mL/min)

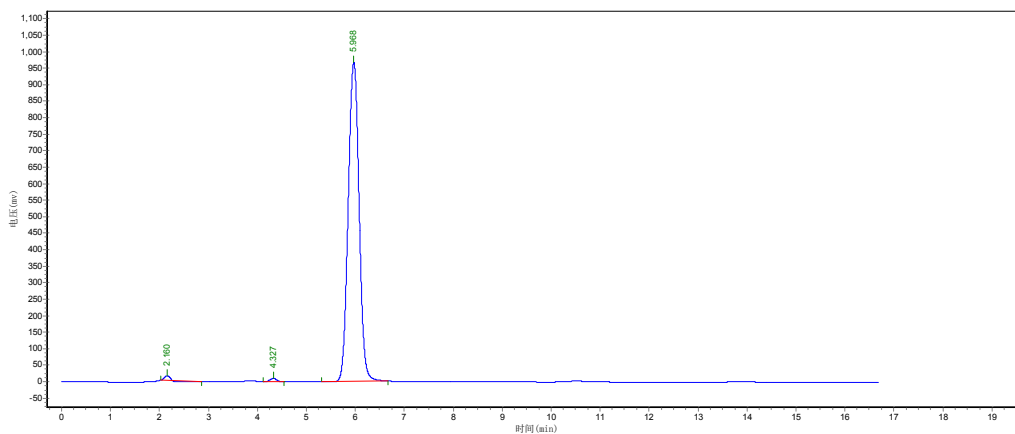

| Name   | Retention Time | Peak height | Area         | Area Percent |
|--------|----------------|-------------|--------------|--------------|
|        | 2.160          | 14440.305   | 56210.852    | 0.3730       |
|        | 4.327          | 10442.141   | 107757.813   | 0.7150       |
|        | 5.968          | 968068.750  | 14907494.000 | 98.9121      |
| Totals |                | 992951.196  | 15071462.665 | 100.0000     |

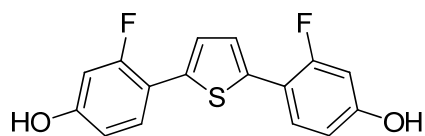

**2e**

Normal Phase(Method 30:70 EtOAc:Hex, Flow rate 1.0 mL/min)

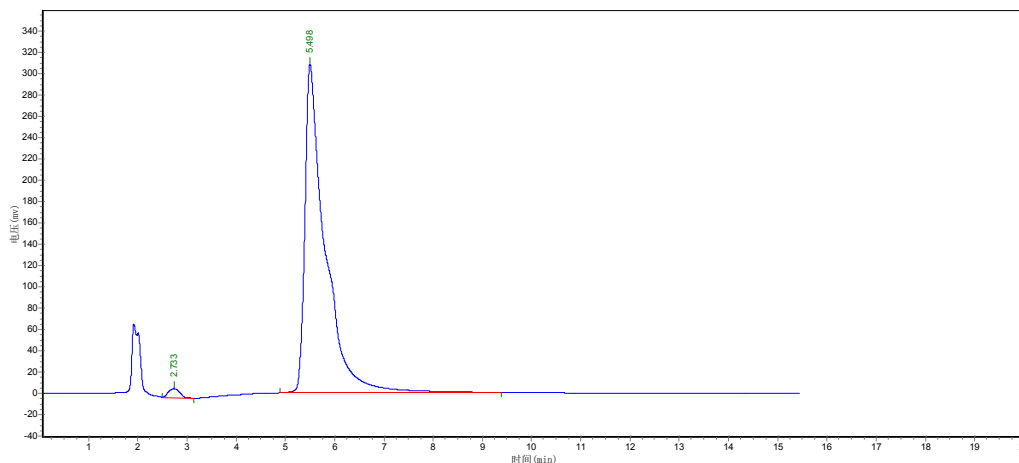

| Name   | Retention Time | Peak height | Area        | Area Percent |
|--------|----------------|-------------|-------------|--------------|
|        | 2.733          | 8464.650    | 132414.594  | 1.4876       |
|        | 5.498          | 308393.063  | 8768765.000 | 98.5124      |
| Totals |                | 316857.713  | 8901179.594 | 100.0000     |

Reverse Phase(Method 70:30 CH<sub>3</sub>CN:H<sub>2</sub>O, Flow rate 0.7 mL/min)

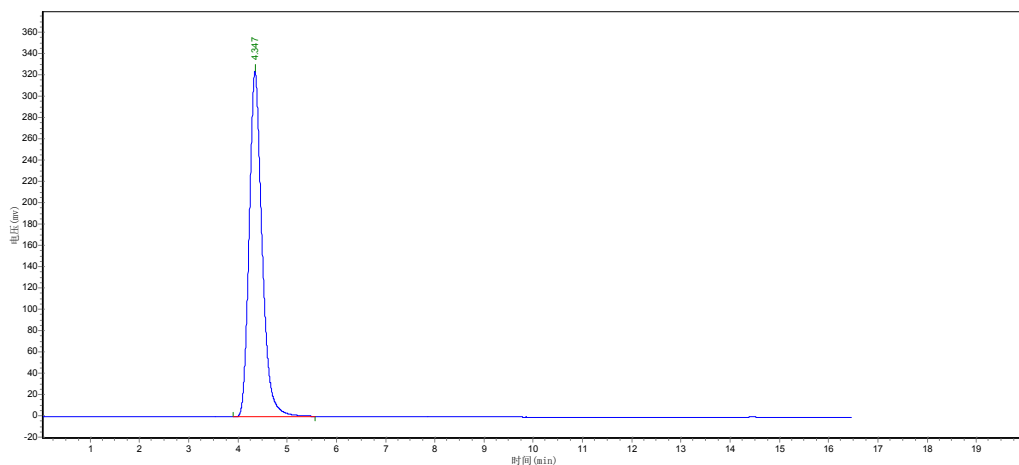

| Name   | Retention Time | Peak height | Area        | Area Percent |
|--------|----------------|-------------|-------------|--------------|
|        | 4.347          | 323917.563  | 5874576.000 | 100.0000     |
| Totals |                | 323917.563  | 5874576.000 | 100.0000     |



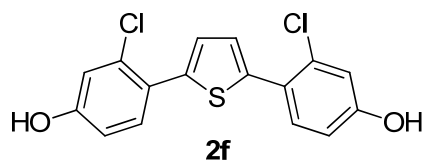

Normal Phase(Method 30:70 EtOAc:Hex, Flow rate 1.0 mL/min)

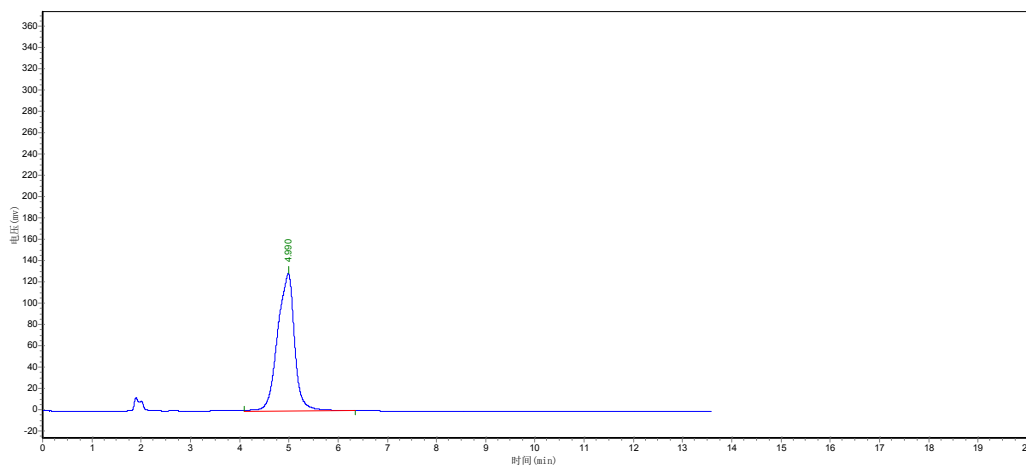

| Name   | Retention Time | Peak height | Area        | Area Percent |
|--------|----------------|-------------|-------------|--------------|
| Totals | 4.990          | 128946.484  | 3090375.750 | 100.0000     |

Reverse Phase(Method 70:30 CH<sub>3</sub>CN:H<sub>2</sub>O, Flow rate 0.7 mL/min)

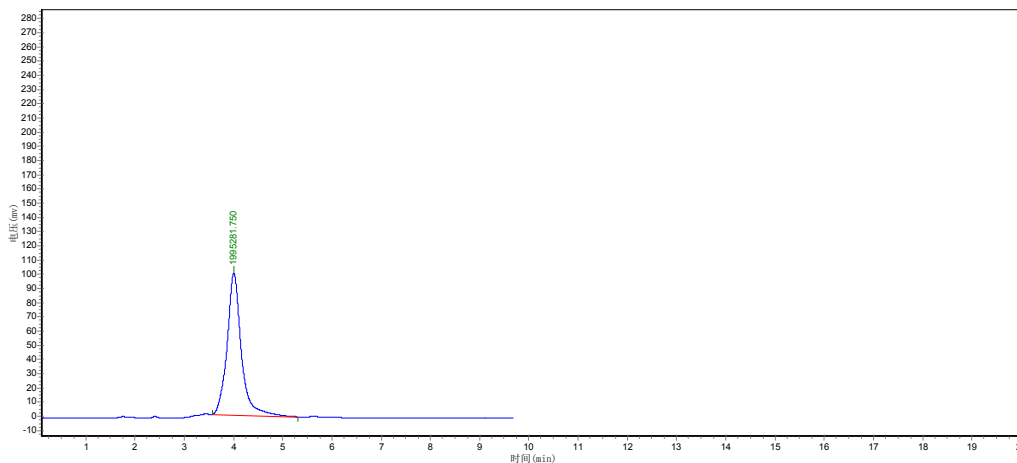

| Name   | Retention Time | Peak height | Area        | Area Percent |
|--------|----------------|-------------|-------------|--------------|
| Totals | 4.007          | 99777.359   | 1995281.750 | 100.0000     |

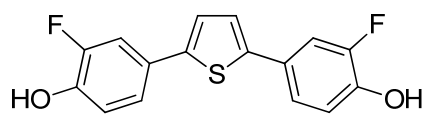

**2g**

Normal Phase(Method 30:70 EtOAc:Hex, Flow rate 1.0 mL/min)

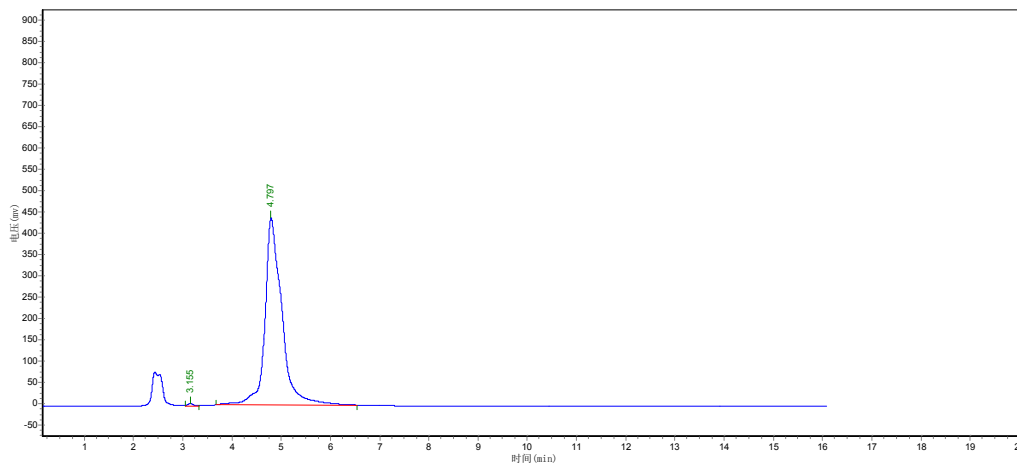

| Name   | Retention Time | Peak height | Area         | Area Percent |
|--------|----------------|-------------|--------------|--------------|
|        | 3.155          | 6850.424    | 69360.430    | 0.6598       |
|        | 4.797          | 438312.781  | 10443035.000 | 99.3402      |
| Totals |                | 445163.205  | 10512395.430 | 100.0000     |

Reverse Phase(Method 70:30 CH<sub>3</sub>CN:H<sub>2</sub>O, Flow rate 0.7 mL/min)

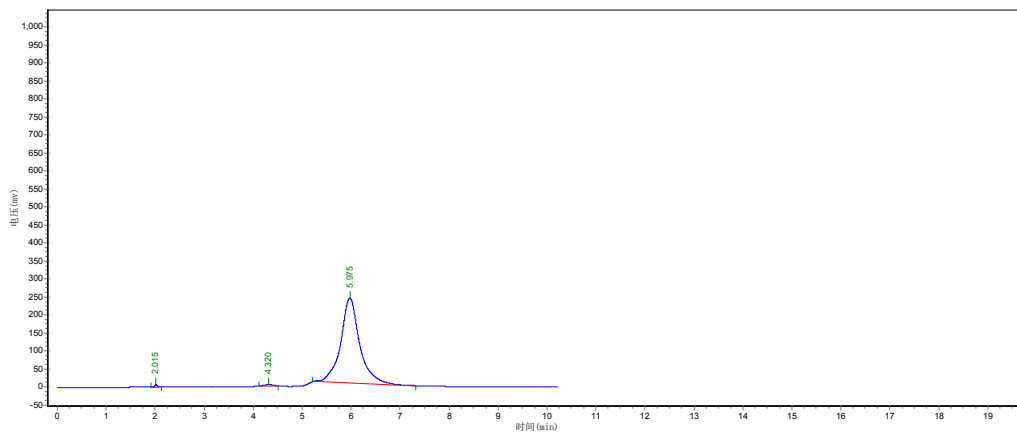

| Name   | Retention Time | Peak height | Area        | Area Percent |
|--------|----------------|-------------|-------------|--------------|
|        | 2.015          | 6950.916    | 33364.789   | 0.4458       |
|        | 4.320          | 7420.315    | 198830.172  | 2.6566       |
|        | 5.975          | 243385.359  | 7252122.500 | 96.8976      |
| Totals |                | 257756.590  | 7484317.461 | 100.0000     |

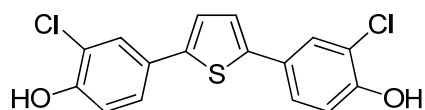

**2h**

Normal Phase(Method 30:70 EtOAc:Hex, Flow rate 1.0 mL/min)

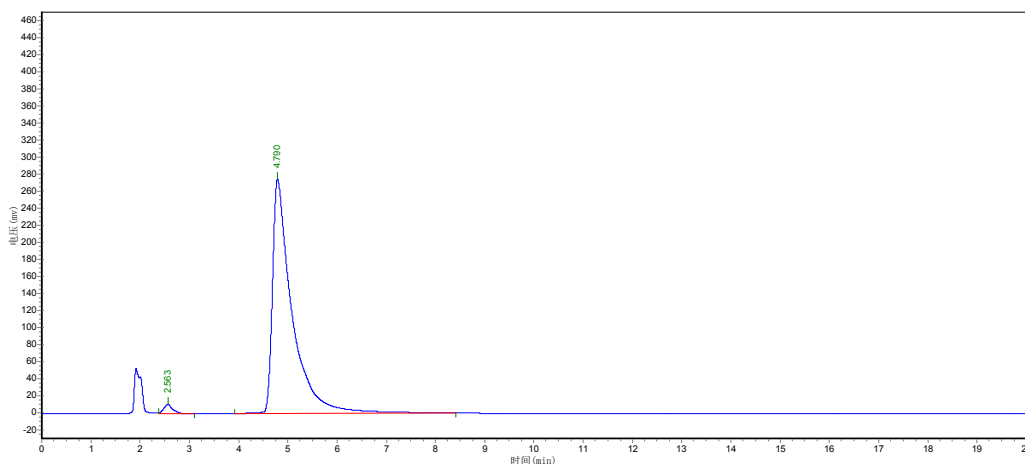

| Name   | Retention Time | Peak height | Area        | Area Percent |
|--------|----------------|-------------|-------------|--------------|
|        | 2.563          | 10979.554   | 140793.328  | 1.8166       |
|        | 4.790          | 275276.063  | 7609512.000 | 98.1834      |
| Totals |                | 286255.617  | 7750305.328 | 100.0000     |

Reverse Phase(Method 70:30 CH<sub>3</sub>CN:H<sub>2</sub>O, Flow rate 0.7 mL/min)

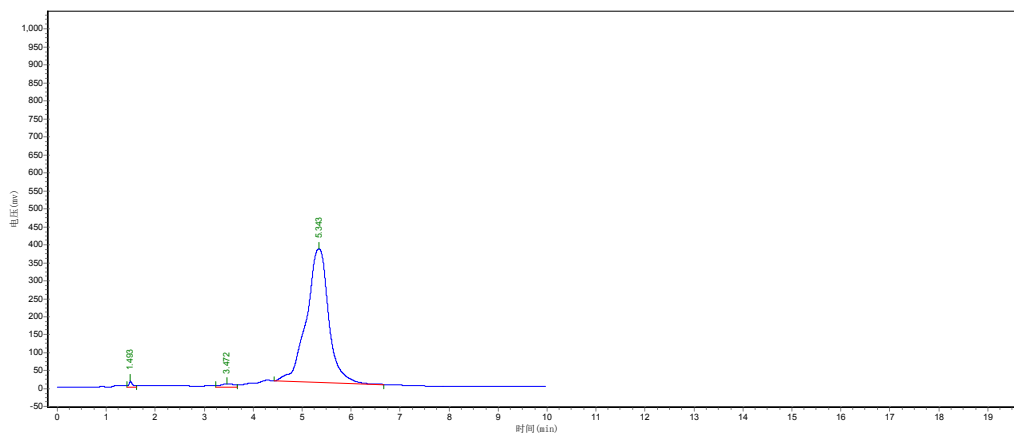

| Name   | Retention Time | Peak height | Area         | Area Percent |
|--------|----------------|-------------|--------------|--------------|
|        | 1.493          | 16517.520   | 88919.898    | 0.7582       |
|        | 3.472          | 8838.831    | 173803.422   | 1.4821       |
|        | 5.343          | 369749.219  | 11464286.000 | 97.7597      |
| Totals |                | 395105.570  | 11727009.320 | 100.0000     |

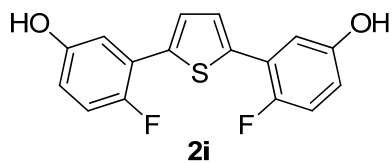

Normal Phase(Method 30:70 EtOAc:Hex, Flow rate 1.0 mL/min)

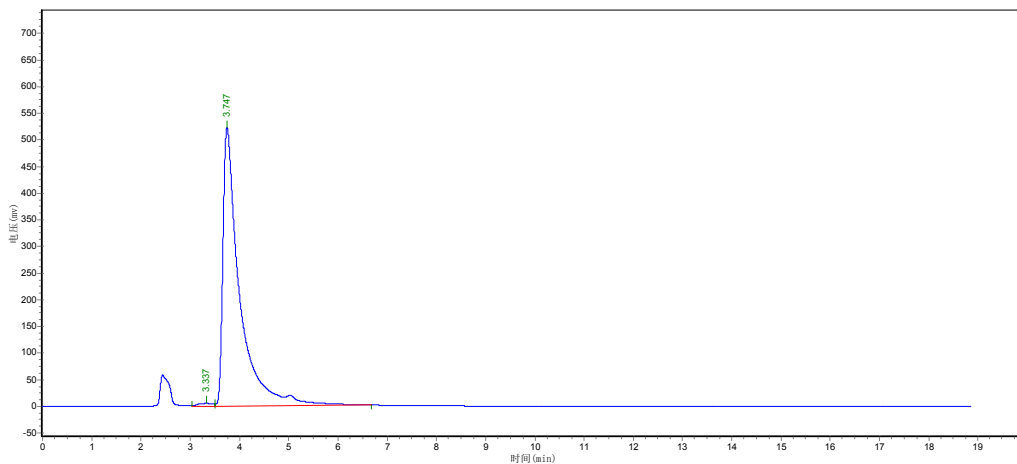

| Name          | Retention Time | Peak height | Area         | Area Percent |
|---------------|----------------|-------------|--------------|--------------|
|               | 3.337          | 5998.810    | 124323.547   | 0.9929       |
|               | 3.747          | 523721.500  | 12396871.000 | 99.0071      |
| <b>Totals</b> |                | 529720.310  | 12521194.547 | 100.0000     |

Reverse Phase(Method 70:30 CH<sub>3</sub>CN:H<sub>2</sub>O, Flow rate 0.7 mL/min)

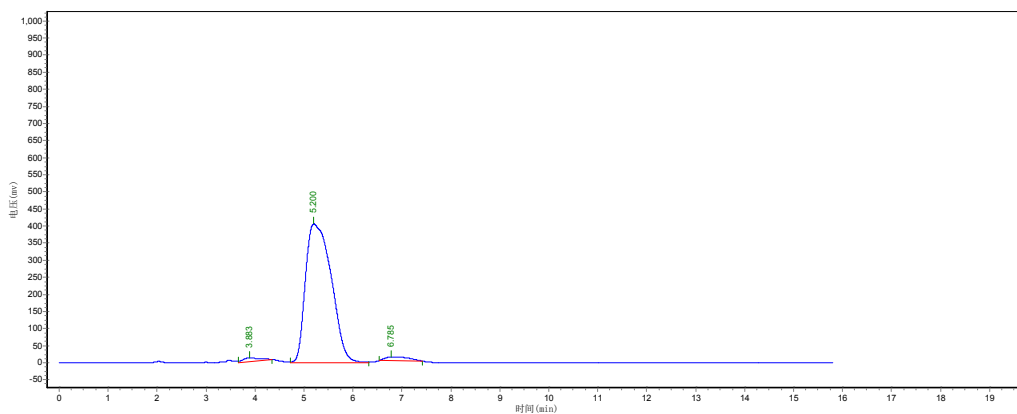

| Name          | Retention Time | Peak height | Area         | Area Percent |
|---------------|----------------|-------------|--------------|--------------|
|               | 3.883          | 10809.248   | 260631.328   | 1.6754       |
|               | 5.200          | 406582.250  | 14915171.000 | 95.8788      |
|               | 6.785          | 10875.766   | 380475.875   | 2.4458       |
| <b>Totals</b> |                | 428267.264  | 15556278.203 | 100.0000     |

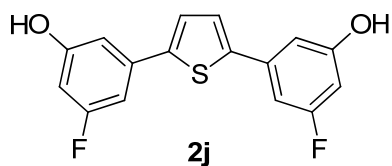

Normal Phase(Method 30:70 EtOAc:Hex, Flow rate 1.0 mL/min)

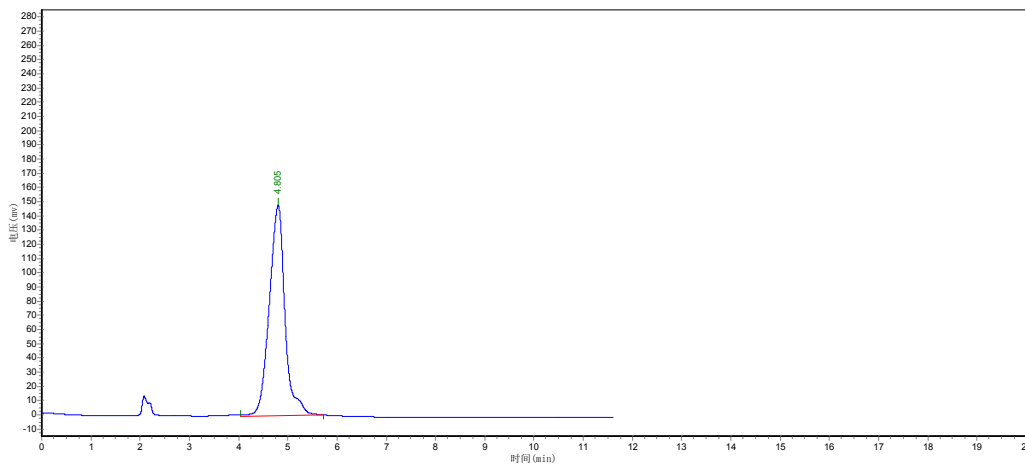

| Name   | Retention Time | Peak height | Area        | Area Percent |
|--------|----------------|-------------|-------------|--------------|
|        | 4.805          | 148272.266  | 3288432.500 | 100.0000     |
| Totals |                | 148272.266  | 3288432.500 | 100.0000     |

Reverse Phase(Method 70:30 CH<sub>3</sub>CN:H<sub>2</sub>O, Flow rate 0.7 mL/min)

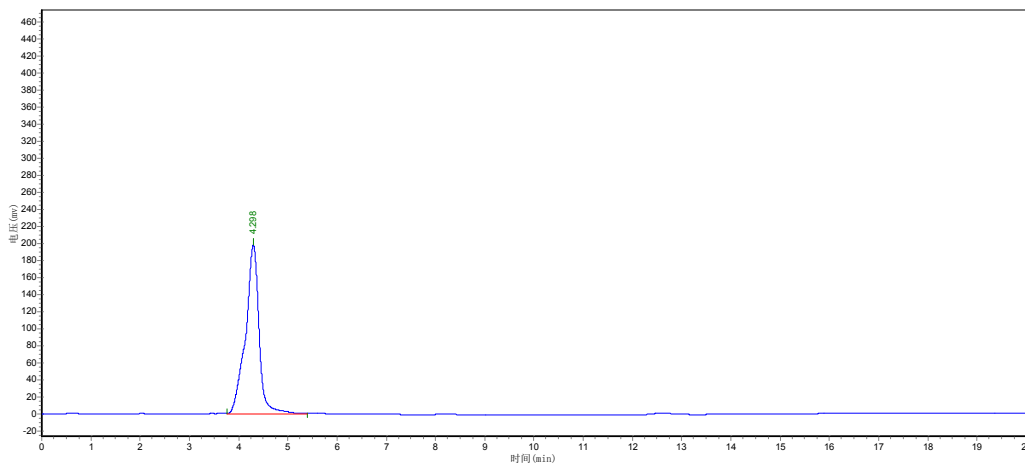

| Name   | Retention Time | Peak height | Area        | Area Percent |
|--------|----------------|-------------|-------------|--------------|
|        | 4.298          | 198462.484  | 3848356.250 | 100.0000     |
| Totals |                | 198462.484  | 3848356.250 | 100.0000     |

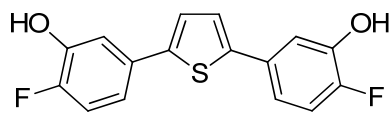

Normal Phase(Method 30:70 EtOAc:Hex, Flow rate 1.0 mL/min)

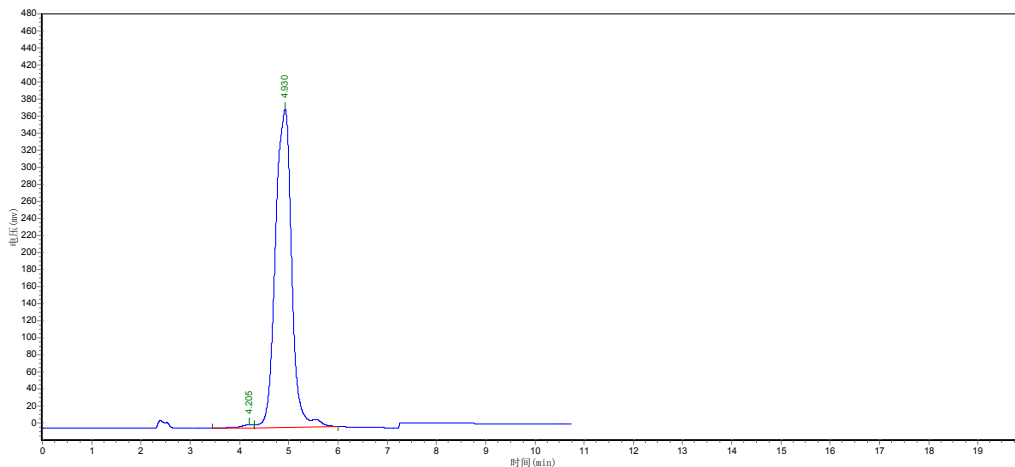

| Name   | Retention Time | Peak height | Area        | Area Percent |
|--------|----------------|-------------|-------------|--------------|
|        | 4.205          | 4309.459    | 87439.852   | 1.0116       |
|        | 4.298          | 373332.000  | 8556315.000 | 98.9884      |
| Totals |                | 377641.459  | 8643754.852 | 100.0000     |

Reverse Phase(Method 70:30 CH<sub>3</sub>CN:H<sub>2</sub>O, Flow rate 0.7 mL/min)

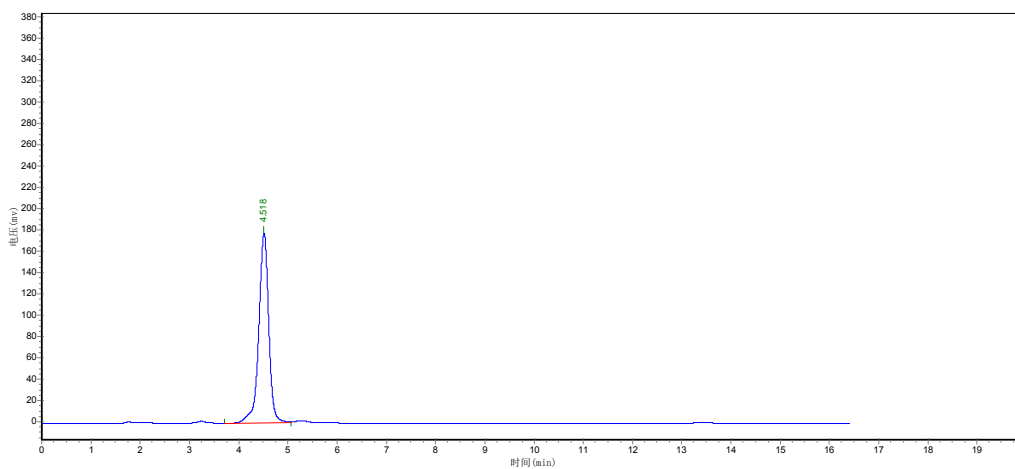

| Name   | Retention Time | Peak height | Area        | Area Percent |
|--------|----------------|-------------|-------------|--------------|
|        | 4.518          | 178184.375  | 2516533.750 | 100.0000     |
| Totals |                | 178184.375  | 2516533.750 | 100.0000     |

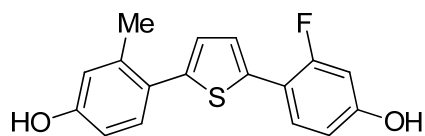

**2I**

Normal Phase(Method 30:70 EtOAc:Hex, Flow rate 1.0 mL/min)

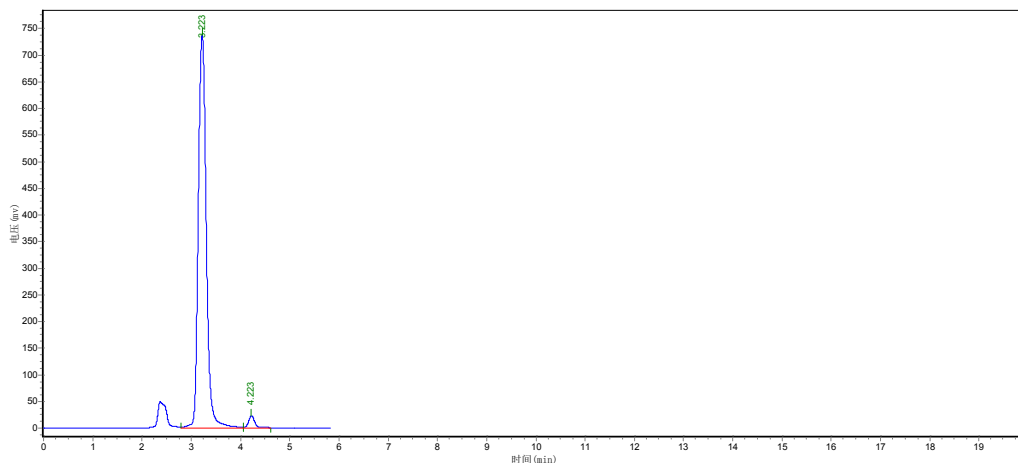

| Name   | Retention Time | Peak height | Area        | Area Percent |
|--------|----------------|-------------|-------------|--------------|
|        | 3.223          | 738001.750  | 8327328.000 | 97.7352      |
|        | 4.223          | 22779.209   | 192968.703  | 2.2648       |
| Totals |                | 760780.959  | 8520296.703 | 100.0000     |

Reverse Phase(Method 70:30 CH<sub>3</sub>CN:H<sub>2</sub>O, Flow rate 0.7 mL/min)

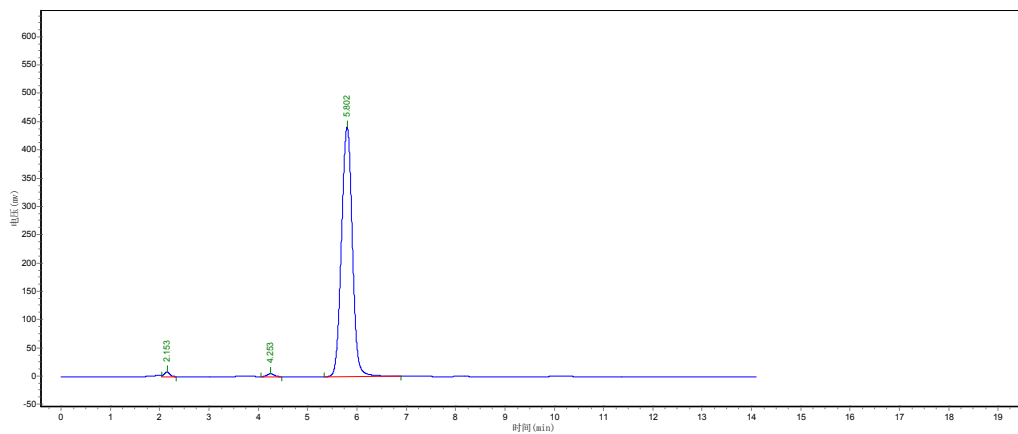

| Name   | Retention Time | Peak height | Area        | Area Percent |
|--------|----------------|-------------|-------------|--------------|
|        | 2.153          | 8825.018    | 68943.492   | 1.0147       |
|        | 4.253          | 5085.852    | 48515.098   | 0.7140       |
|        | 5.802          | 440713.219  | 6677234.000 | 98.2713      |
| Totals |                | 454624.089  | 6794692.590 | 100.0000     |

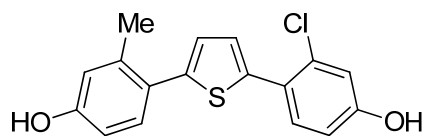

**2m**

Normal Phase(Method 30:70 EtOAc:Hex, Flow rate 1.0 mL/min)

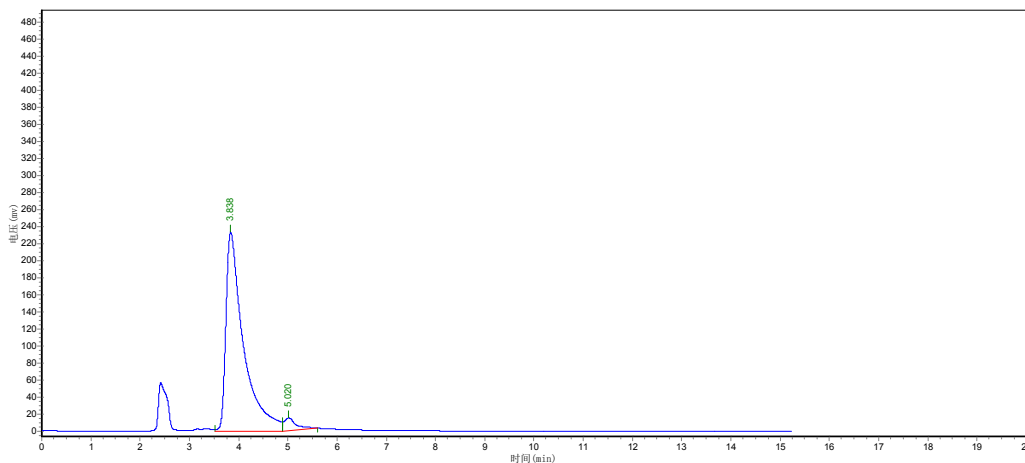

| Name   | Retention Time | Peak height | Area        | Area Percent |
|--------|----------------|-------------|-------------|--------------|
|        | 3.838          | 233712.094  | 5787899.000 | 95.6289      |
|        | 5.020          | 15164.579   | 264558.656  | 4.3711       |
| Totals |                | 248876.673  | 6052457.656 | 100.0000     |

Reverse Phase(Method 70:30 CH<sub>3</sub>CN:H<sub>2</sub>O, Flow rate 0.7 mL/min)

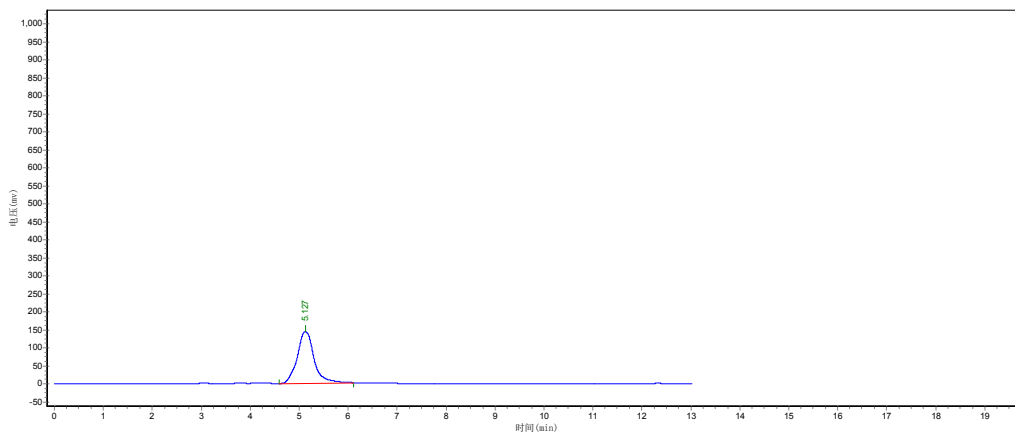

| Name   | Retention Time | Peak height | Area        | Area Percent |
|--------|----------------|-------------|-------------|--------------|
|        | 5.127          | 143277.453  | 3413929.000 | 100.0000     |
| Totals |                | 143277.453  | 3413929.000 | 100.0000     |



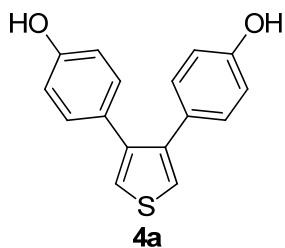

Normal Phase(Method 30:70 EtOAc:Hex, Flow rate 1.0 mL/min)

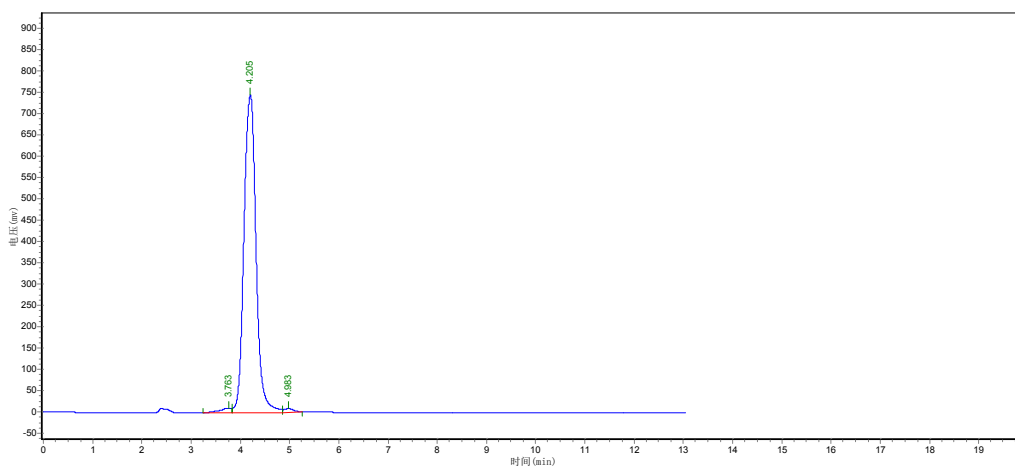

| Name          | Retention Time | Peak height       | Area                | Area Percent    |
|---------------|----------------|-------------------|---------------------|-----------------|
|               | 3.435          | 687079.875        | 10677790.000        | 95.6272         |
|               | 4.055          | 43494.699         | 488263.563          | 4.3727          |
| <b>Totals</b> |                | <b>730574.574</b> | <b>11166053.563</b> | <b>100.0000</b> |

Reverse Phase(Method 70:30 CH<sub>3</sub>CN:H<sub>2</sub>O, Flow rate 0.7 mL/min)

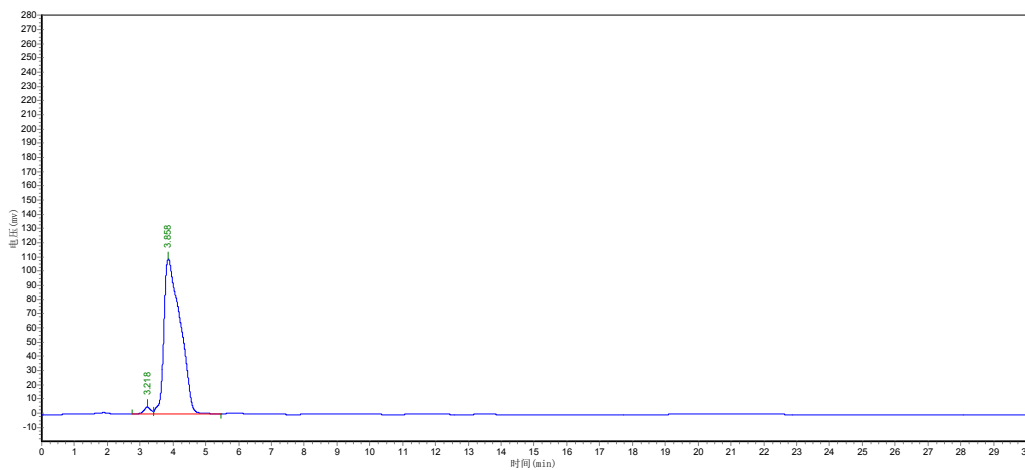

| Name          | Retention Time | Peak height       | Area               | Area Percent    |
|---------------|----------------|-------------------|--------------------|-----------------|
|               | 3.218          | 5168.713          | 75431.430          | 1.9488          |
|               | 3.858          | 109204.406        | 3795189.000        | 98.0512         |
| <b>Totals</b> |                | <b>114373.119</b> | <b>3870620.430</b> | <b>100.0000</b> |

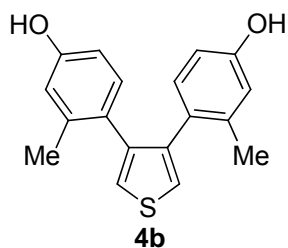

Normal Phase(Method 40:60 EtOAc:Hex, Flow rate 1.0 mL/min)

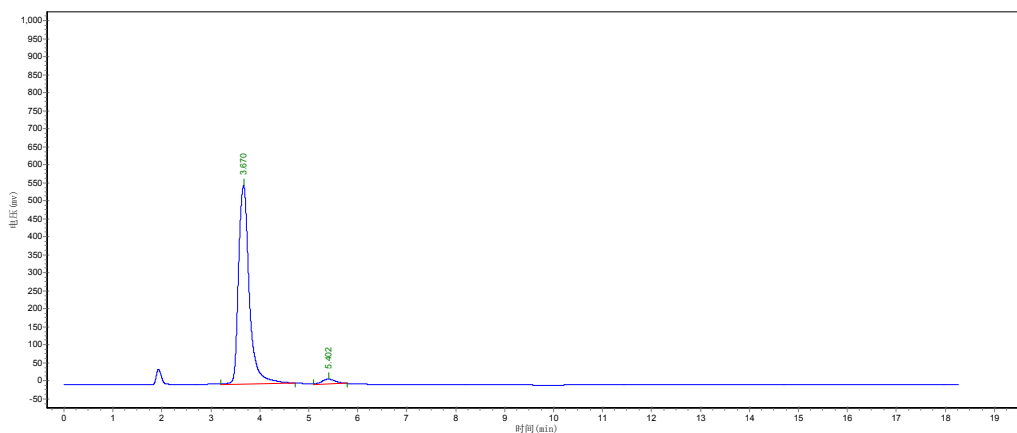

| Name          | Retention Time | Peak height       | Area               | Area Percent    |
|---------------|----------------|-------------------|--------------------|-----------------|
|               | 3.670          | 552535.813        | 8447569.000        | 96.6890         |
|               | 5.402          | 14168.037         | 289280.406         | 3.3110          |
| <b>Totals</b> |                | <b>566703.850</b> | <b>8736849.406</b> | <b>100.0000</b> |

Reverse Phase(Method 70:30 CH<sub>3</sub>CN:H<sub>2</sub>O, Flow rate 0.7 mL/min)

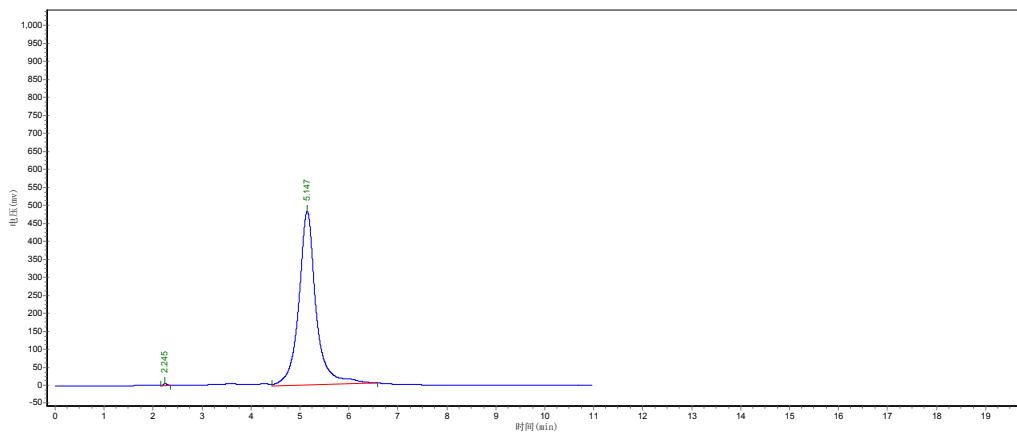

| Name          | Retention Time | Peak height       | Area                | Area Percent    |
|---------------|----------------|-------------------|---------------------|-----------------|
|               | 2.245          | 6308.801          | 31386.576           | 0.2655          |
|               | 5.147          | 481230.594        | 11790560.000        | 99.7345         |
| <b>Totals</b> |                | <b>487539.395</b> | <b>11821946.576</b> | <b>100.0000</b> |

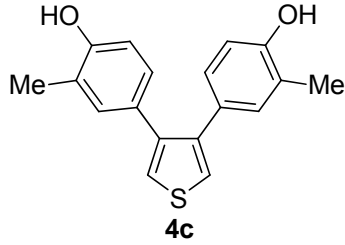

Normal Phase(Method 30:70 EtOAc:Hex, Flow rate 1.0 mL/min)

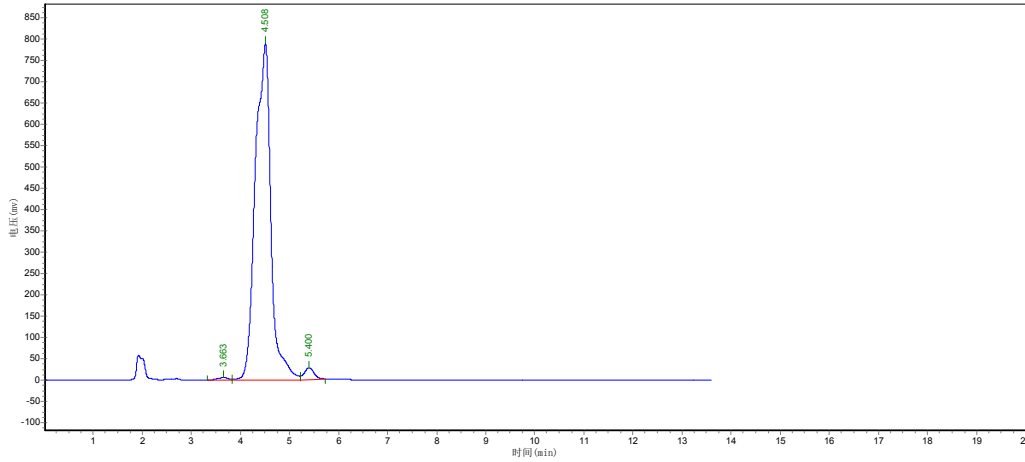

| Name          | Retention Time | Peak height       | Area                | Area Percent    |
|---------------|----------------|-------------------|---------------------|-----------------|
|               | 3.663          | 5594.049          | 86859.820           | 0.4855          |
|               | 4.508          | 789576.875        | 17412258.000        | 97.3305         |
|               | 5.400          | 27655.203         | 390712.188          | 2.1840          |
| <b>Totals</b> |                | <b>822826.127</b> | <b>17889830.008</b> | <b>100.0000</b> |

Reverse Phase(Method 70:30 CH<sub>3</sub>CN:H<sub>2</sub>O, Flow rate 0.7 mL/min)

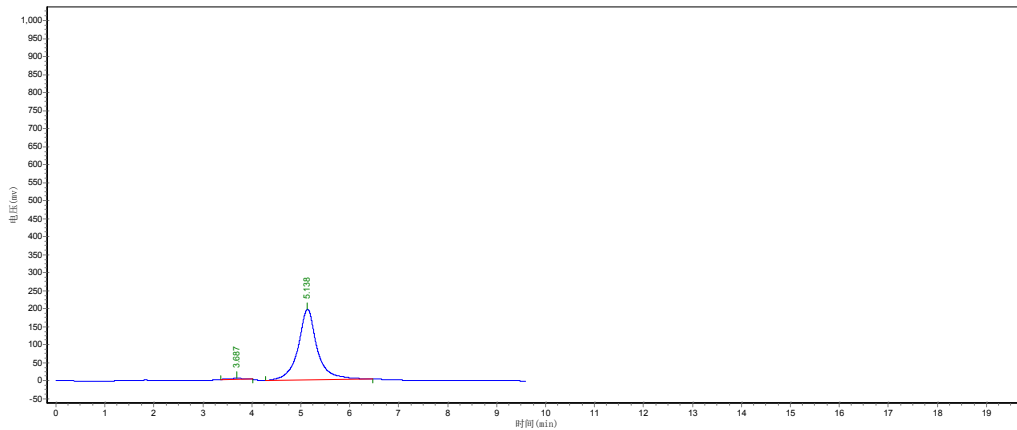

| Name          | Retention Time | Peak height       | Area               | Area Percent    |
|---------------|----------------|-------------------|--------------------|-----------------|
|               | 3.687          | 1656.342          | 32066.596          | 0.5687          |
|               | 5.138          | 197740.422        | 5606437.500        | 99.4313         |
| <b>Totals</b> |                | <b>199396.764</b> | <b>5638504.096</b> | <b>100.0000</b> |

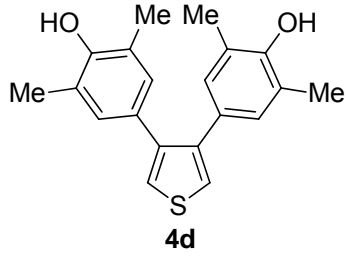

Normal Phase(Method 30:70 EtOAc:Hex, Flow rate 1.0 mL/min)

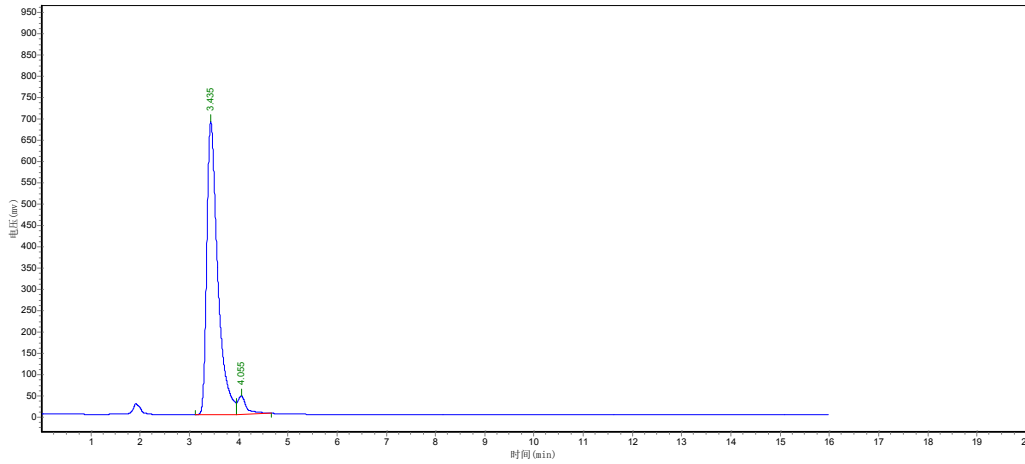

| Name          | Retention Time | Peak height       | Area                | Area Percent    |
|---------------|----------------|-------------------|---------------------|-----------------|
|               | 3.435          | 687079.875        | 10677790.000        | 95.0513         |
|               | 4.055          | 44192.273         | 555927.438          | 4.9487          |
| <b>Totals</b> |                | <b>731272.948</b> | <b>11233717.438</b> | <b>100.0000</b> |

Reverse Phase(Method 70:30 CH<sub>3</sub>CN:H<sub>2</sub>O, Flow rate 0.7 mL/min)

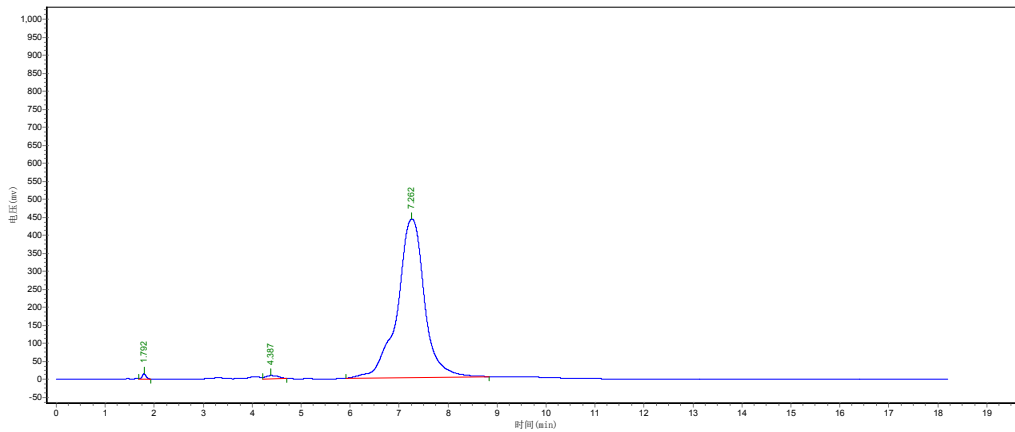

| Name          | Retention Time | Peak height       | Area                | Area Percent    |
|---------------|----------------|-------------------|---------------------|-----------------|
|               | 1.792          | 15864.683         | 97023.703           | 0.5452          |
|               | 4.387          | 10386.066         | 233831.047          | 1.3139          |
|               | 7.262          | 443163.031        | 17466204.000        | 98.1410         |
| <b>Totals</b> |                | <b>469413.780</b> | <b>17797058.750</b> | <b>100.0000</b> |

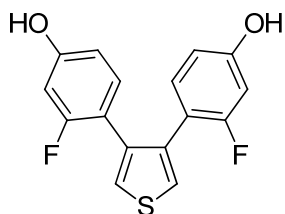

**4e**

Normal Phase(Method 30:70 EtOAc:Hex, Flow rate 1.0 mL/min)

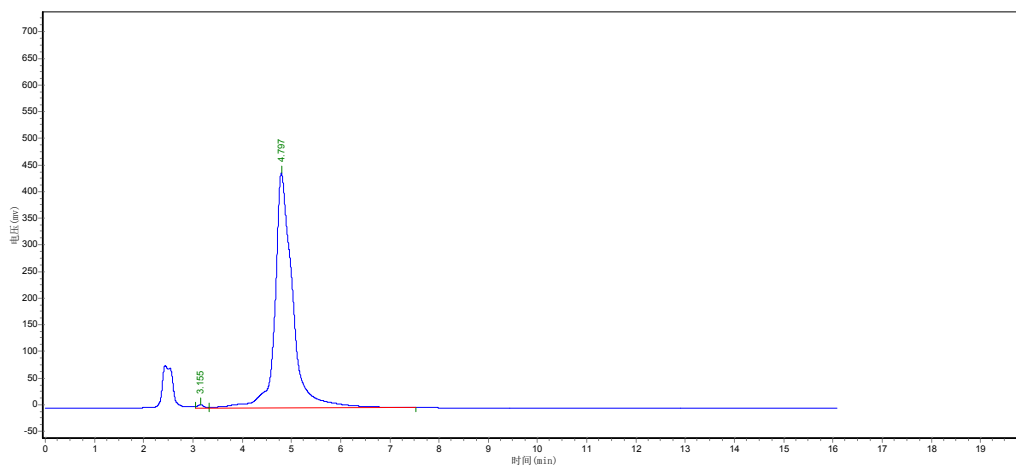

| Name   | Retention Time | Peak height | Area         | Area Percent |
|--------|----------------|-------------|--------------|--------------|
|        | 3.155          | 6850.424    | 69360.430    | 0.6213       |
|        | 4.797          | 441618.781  | 11093890.000 | 99.3787      |
| Totals |                | 448469.205  | 11163250.430 | 100.0000     |

Reverse Phase(Method 70:30 CH<sub>3</sub>CN:H<sub>2</sub>O, Flow rate 0.7 mL/min)

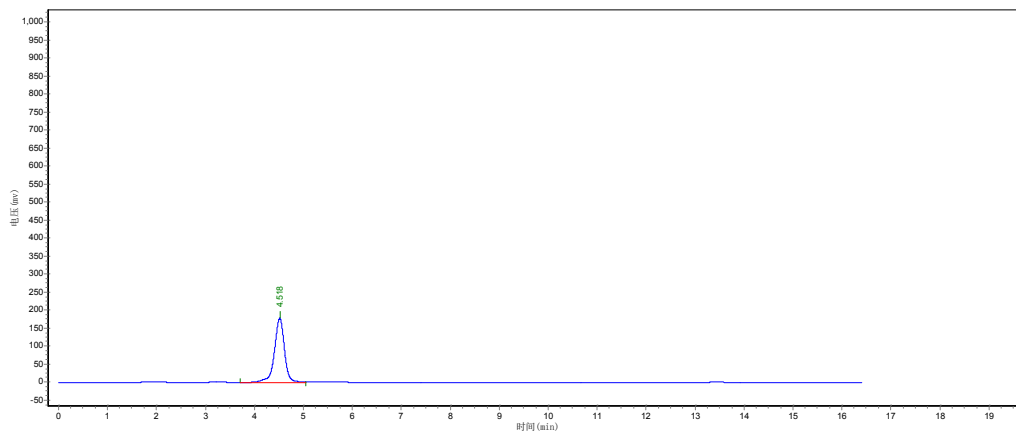

| Name   | Retention Time | Peak height | Area        | Area Percent |
|--------|----------------|-------------|-------------|--------------|
|        | 4.518          | 178184.375  | 2516533.750 | 100.0000     |
| Totals |                | 178184.375  | 2516533.750 | 100.0000     |

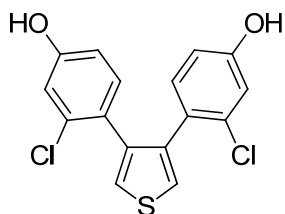

**4f**

Normal Phase(Method 30:70 EtOAc:Hex, Flow rate 1.0 mL/min)

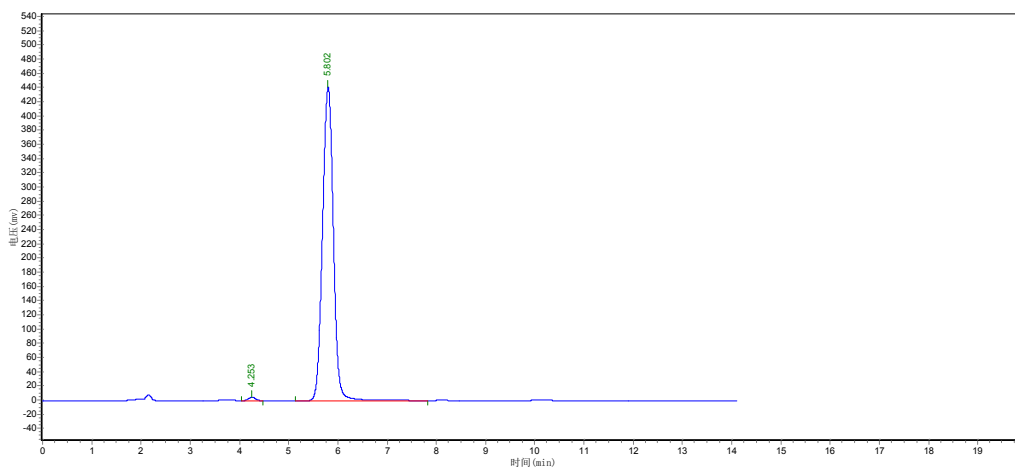

| Name   | Retention Time | Peak height | Area        | Area Percent |
|--------|----------------|-------------|-------------|--------------|
|        | 4.253          | 5085.852    | 48515.098   | 0.7075       |
| Totals | 5.802          | 441520.719  | 6808895.500 | 99.2925      |
|        |                | 446606.570  | 6857410.598 | 100.0000     |

Reverse Phase(Method 70:30 CH<sub>3</sub>CN:H<sub>2</sub>O, Flow rate 0.7 mL/min)

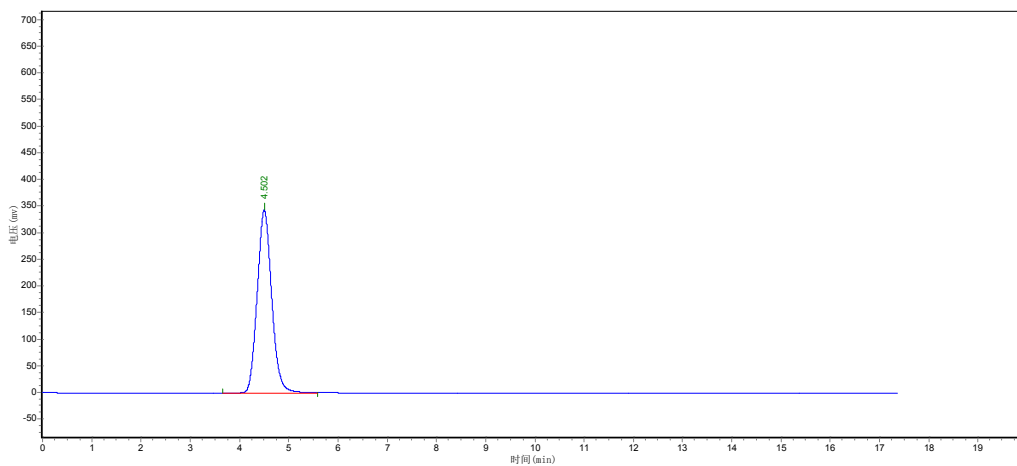

| Name   | Retention Time | Peak height | Area        | Area Percent |
|--------|----------------|-------------|-------------|--------------|
|        | 4.502          | 343937.344  | 7073932.000 | 100.0000     |
| Totals |                | 343937.344  | 7073932.000 | 100.0000     |

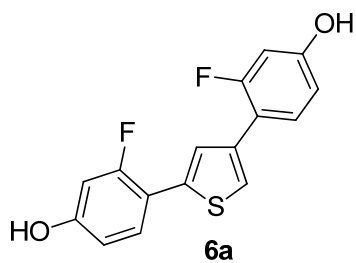

Normal Phase(Method 30:70 EtOAc:Hex, Flow rate 1.0 mL/min)

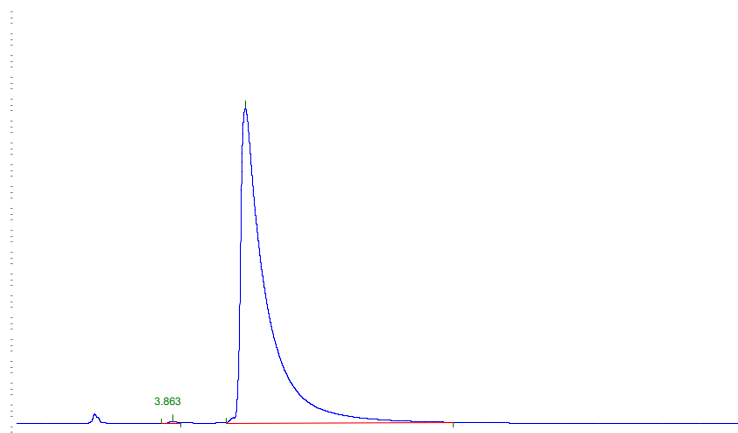

| Name   | Retention Time | Peak height | Area         | Area Percent |
|--------|----------------|-------------|--------------|--------------|
|        | 3.863          | 5641.618    | 84202.594    | 0.2688       |
|        | 5.653          | 721665.063  | 31244736.000 | 99.7312      |
| Totals |                | 727306.681  | 31328938.594 | 100.0000     |

Reverse Phase(Method 70:30 CH<sub>3</sub>CN:H<sub>2</sub>O, Flow rate 0.7 mL/min)

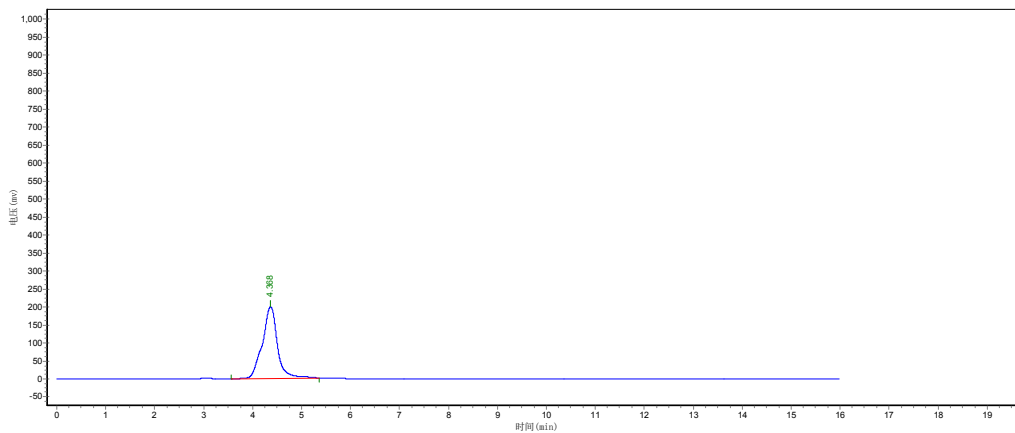

| Name   | Retention Time | Peak height | Area        | Area Percent |
|--------|----------------|-------------|-------------|--------------|
|        | 4.368          | 197315.859  | 4060958.750 | 100.0000     |
| Totals |                | 197315.859  | 4060958.750 | 100.0000     |

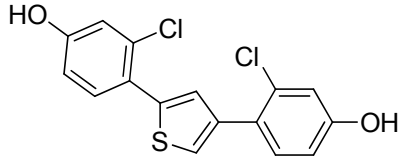

**6b**

Normal Phase(Method 30:70 EtOAc:Hex, Flow rate 1.0 mL/min)

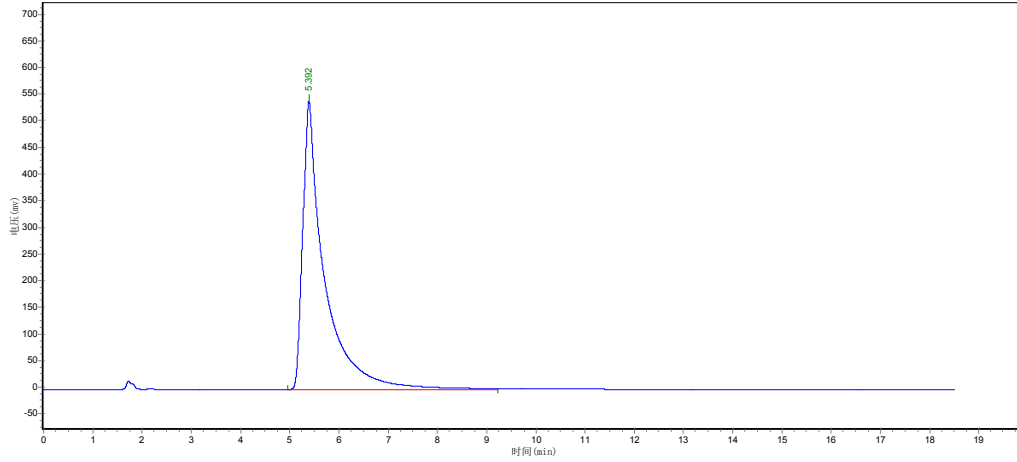

| Name   | Retention Time | Peak height | Area         | Area Percent |
|--------|----------------|-------------|--------------|--------------|
| Totals | 5.392          | 541999.125  | 16820268.000 | 100.0000     |

Reverse Phase(Method 70:30 CH<sub>3</sub>CN:H<sub>2</sub>O, Flow rate 0.7 mL/min)

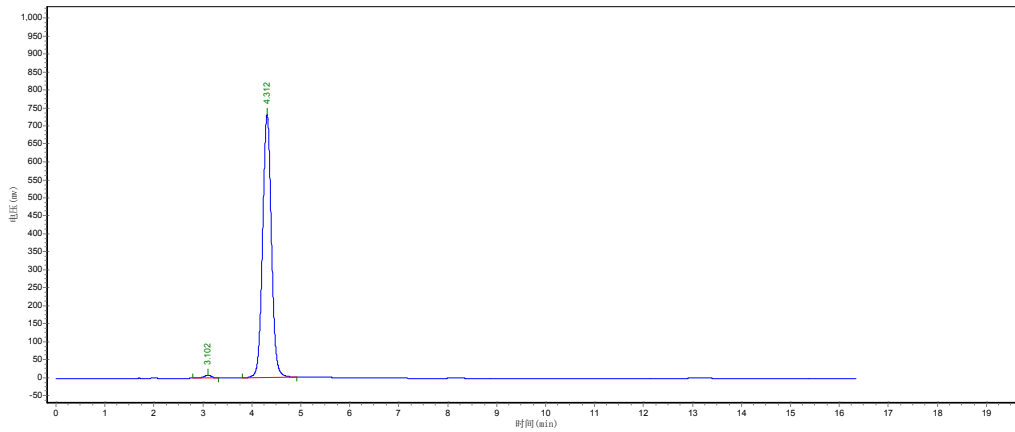

| Name   | Retention Time | Peak height | Area        | Area Percent |
|--------|----------------|-------------|-------------|--------------|
|        | 3.102          | 8499.513    | 89030.250   | 0.9482       |
|        | 4.312          | 731945.188  | 9300281.000 | 99.0518      |
| Totals |                | 740444.701  | 9389311.25  | 100.0000     |



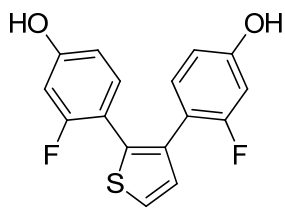

**8a**

Normal Phase(Method 30:70 EtOAc:Hex, Flow rate 1.0 mL/min)

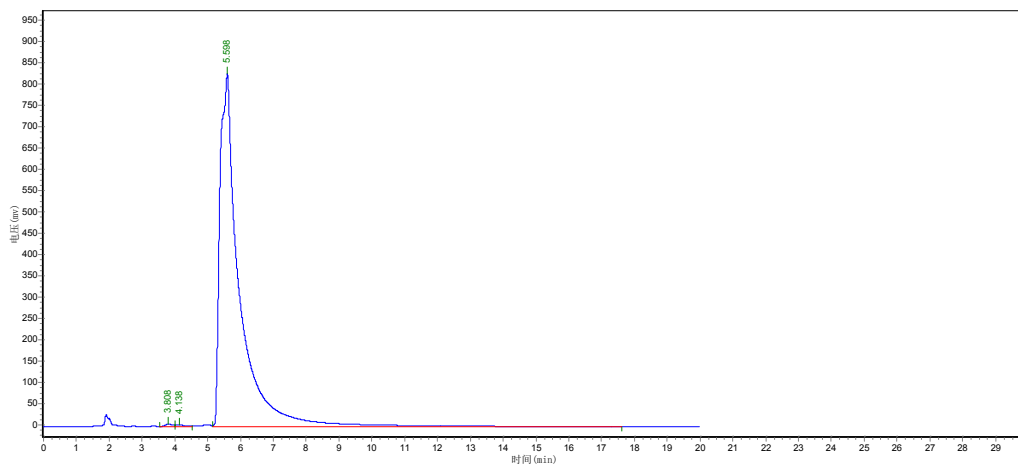

| Name   | Retention Time | Peak height | Area         | Area Percent |
|--------|----------------|-------------|--------------|--------------|
|        | 3.808          | 6262.274    | 93087.719    | 0.2710       |
|        | 4.138          | 3517.807    | 68057.898    | 0.1982       |
|        | 5.598          | 827602.313  | 34184120.000 | 99.5308      |
| Totals |                | 837382.394  | 34345265.617 | 100.0000     |

Reverse Phase(Method 70:30 CH<sub>3</sub>CN:H<sub>2</sub>O, Flow rate 0.7 mL/min)

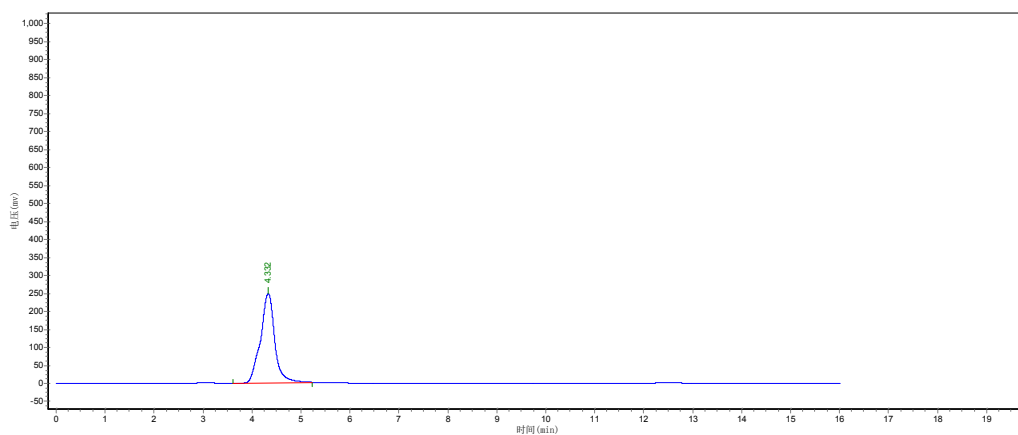

| Name   | Retention Time | Peak height | Area        | Area Percent |
|--------|----------------|-------------|-------------|--------------|
|        | 4.332          | 249522.125  | 5203304.500 | 100.0000     |
| Totals |                | 249522.125  | 5203304.500 | 100.0000     |

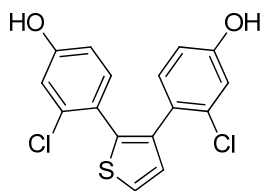

**8b**

Normal Phase(Method 30:70 EtOAc:Hex, Flow rate 1.0 mL/min)

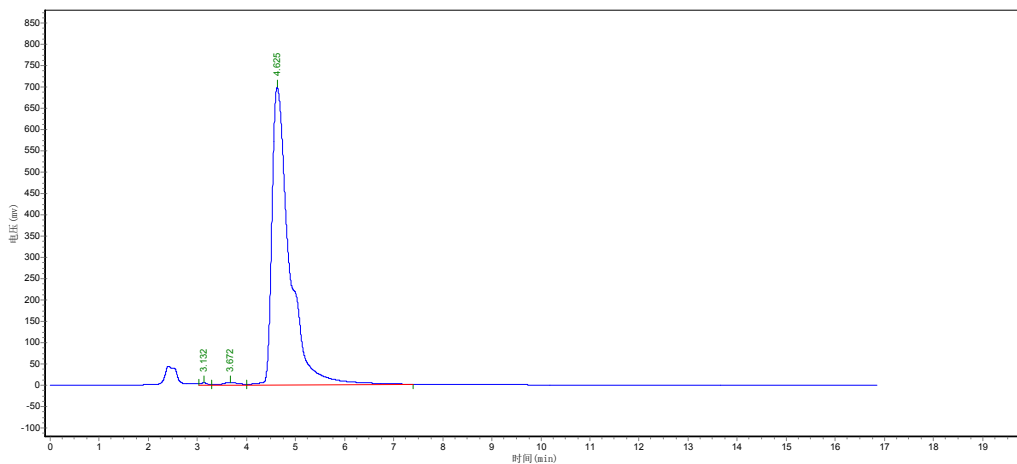

| Name   | Retention Time | Peak height | Area         | Area Percent |
|--------|----------------|-------------|--------------|--------------|
|        | 3.132          | 6010.696    | 60064.996    | 0.3418       |
|        | 3.672          | 6408.811    | 172141.234   | 0.9796       |
|        | 4.625          | 698588.000  | 17340244.000 | 98.6786      |
| Totals |                | 711007.507  | 17572450.230 | 100.0000     |

Reverse Phase(Method 70:30 CH<sub>3</sub>CN:H<sub>2</sub>O, Flow rate 0.7 mL/min)

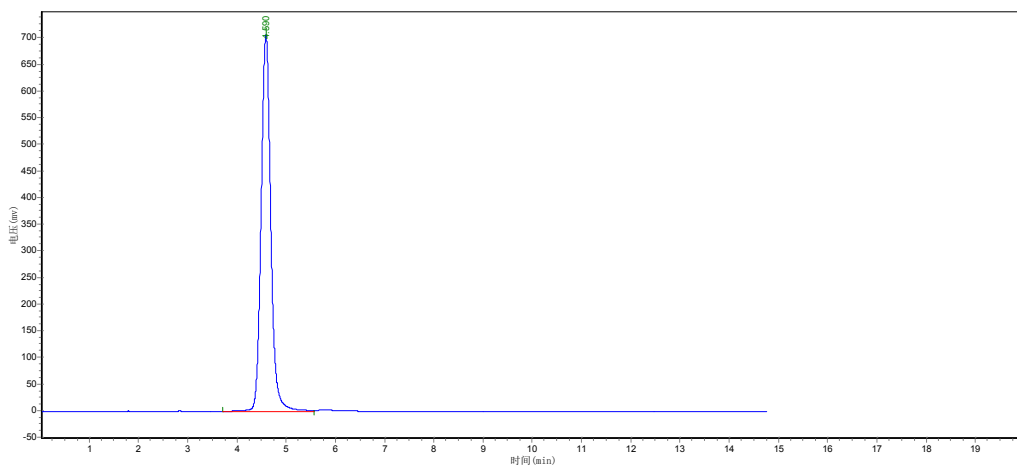

| Name   | Retention Time | Peak height | Area        | Area Percent |
|--------|----------------|-------------|-------------|--------------|
|        | 4.590          | 707387.438  | 9649499.000 | 100.0000     |
| Totals |                | 707387.438  | 9649499.000 | 100.0000     |

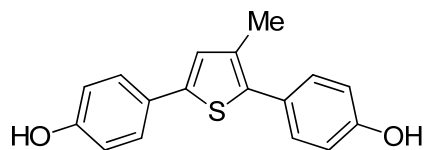

**10a**

Normal Phase(Method 30:70 EtOAc:Hex, Flow rate 1.0 mL/min)

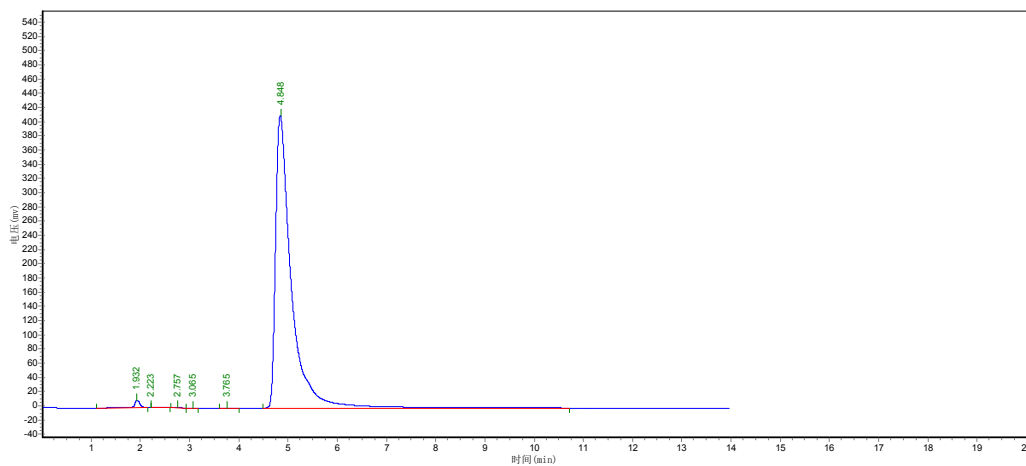

| Name   | Retention Time | Peak height | Area        | Area Percent |
|--------|----------------|-------------|-------------|--------------|
| Totals | 4.848          | 411299.719  | 9102504.000 | 100.0000     |
| Totals |                | 411299.719  | 9102504.000 | 100.0000     |

Reverse Phase(Method 70:30 CH<sub>3</sub>CN:H<sub>2</sub>O, Flow rate 0.7 mL/min)

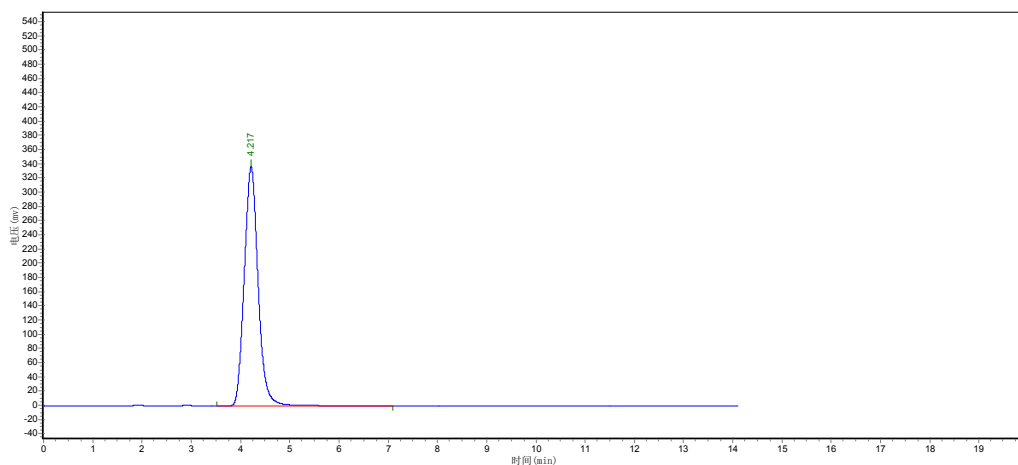

| Name   | Retention Time | Peak height | Area        | Area Percent |
|--------|----------------|-------------|-------------|--------------|
| Totals | 4.217          | 336551.594  | 6596959.000 | 100.0000     |
| Totals |                | 336551.594  | 6596959.000 | 100.0000     |

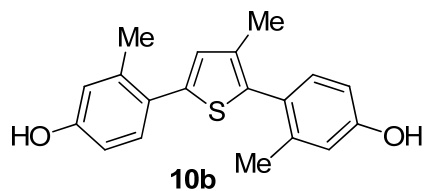

Normal Phase(Method 30:70 EtOAc:Hex, Flow rate 1.0 mL/min)

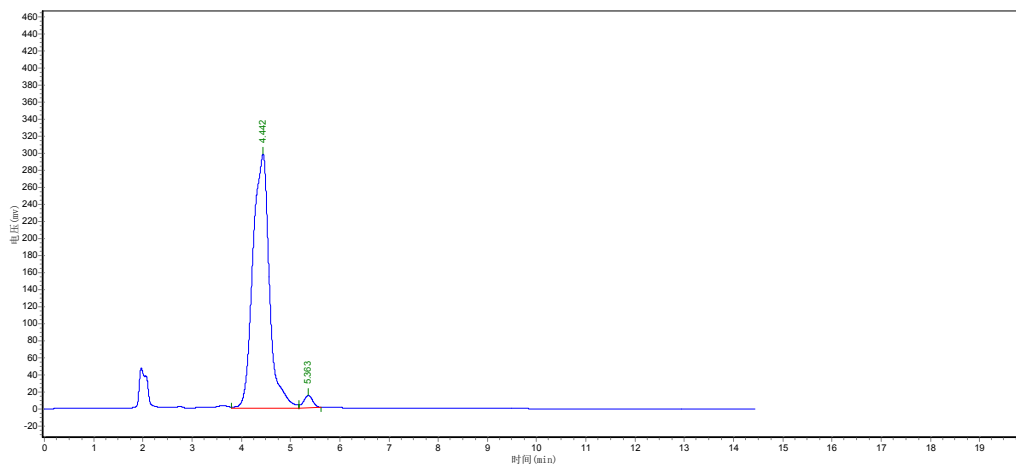

| Name   | Retention Time | Peak height | Area        | Area Percent |
|--------|----------------|-------------|-------------|--------------|
|        | 4.442          | 297818.031  | 6931385.500 | 97.4312      |
|        | 5.363          | 14160.913   | 182745.031  | 2.5688       |
| Totals |                | 311978.944  | 7114130.531 | 100.0000     |

Reverse Phase(Method 70:30 CH<sub>3</sub>CN:H<sub>2</sub>O, Flow rate 0.7 mL/min)

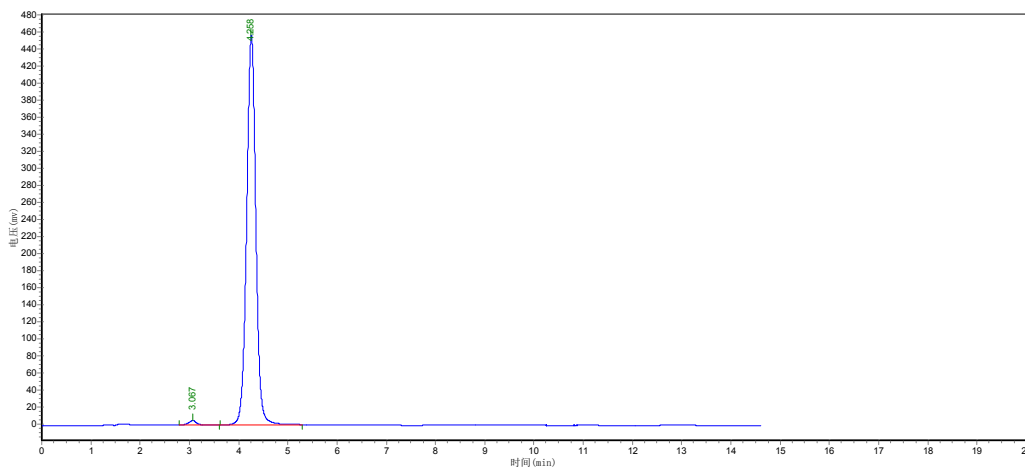

| Name   | Retention Time | Peak height | Area        | Area Percent |
|--------|----------------|-------------|-------------|--------------|
|        | 3.067          | 5459.500    | 62780.805   | 1.0422       |
|        | 4.258          | 457213.844  | 5960887.000 | 98.9578      |
| Totals |                | 462673.344  | 6023667.803 | 100.0000     |

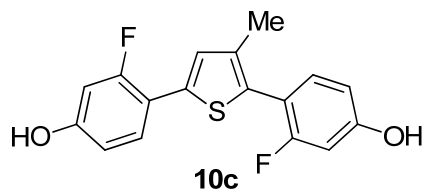

Normal Phase(Method 30:70 EtOAc:Hex, Flow rate 1.0 mL/min)

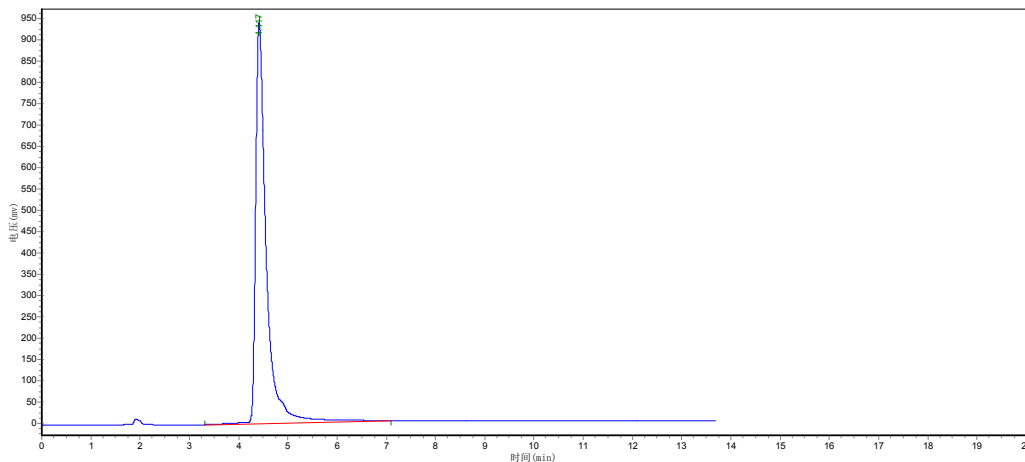

| Name   | Retention Time | Peak height | Area         | Area Percent |
|--------|----------------|-------------|--------------|--------------|
|        | 4.417          | 940445.000  | 14073680.000 | 100.0000     |
| Totals |                | 940445.000  | 14073680.000 | 100.0000     |

Reverse Phase(Method 70:30 CH<sub>3</sub>CN:H<sub>2</sub>O, Flow rate 0.7 mL/min)

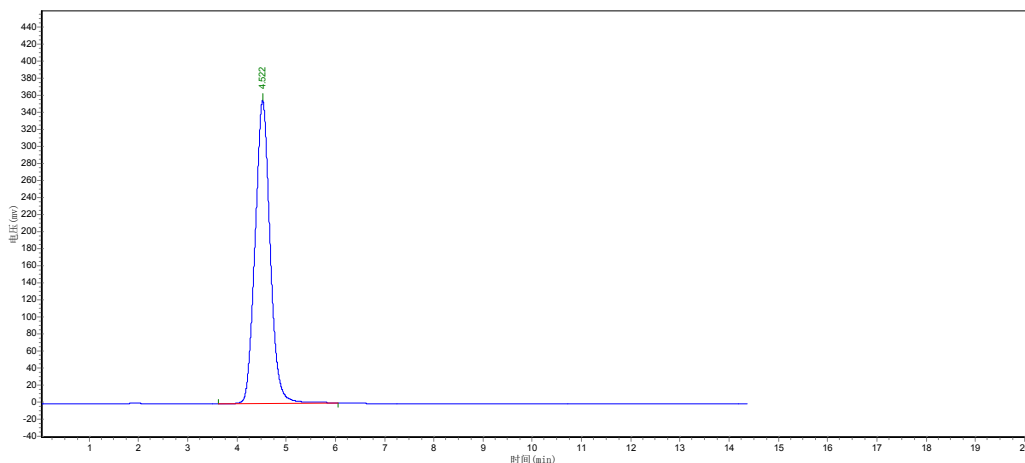

| Name   | Retention Time | Peak height | Area        | Area Percent |
|--------|----------------|-------------|-------------|--------------|
|        | 4.522          | 355866.875  | 7531634.000 | 100.0000     |
| Totals |                | 355866.875  | 7531634.000 | 100.0000     |

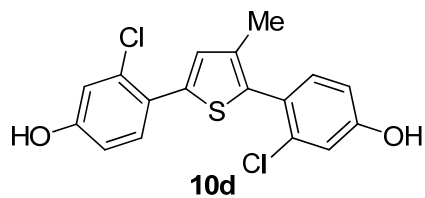

Normal Phase(Method 30:70 EtOAc:Hex, Flow rate 1.0 mL/min)

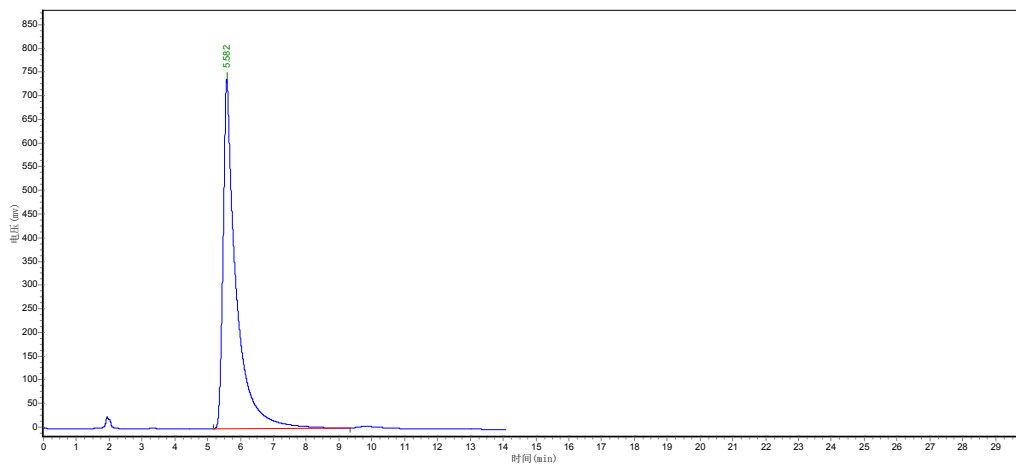

| Name   | Retention Time | Peak height | Area         | Area Percent |
|--------|----------------|-------------|--------------|--------------|
| Totals | 5.582          | 738943.813  | 20204630.000 | 100.0000     |

Reverse Phase(Method 70:30 CH<sub>3</sub>CN:H<sub>2</sub>O, Flow rate 0.7 mL/min)

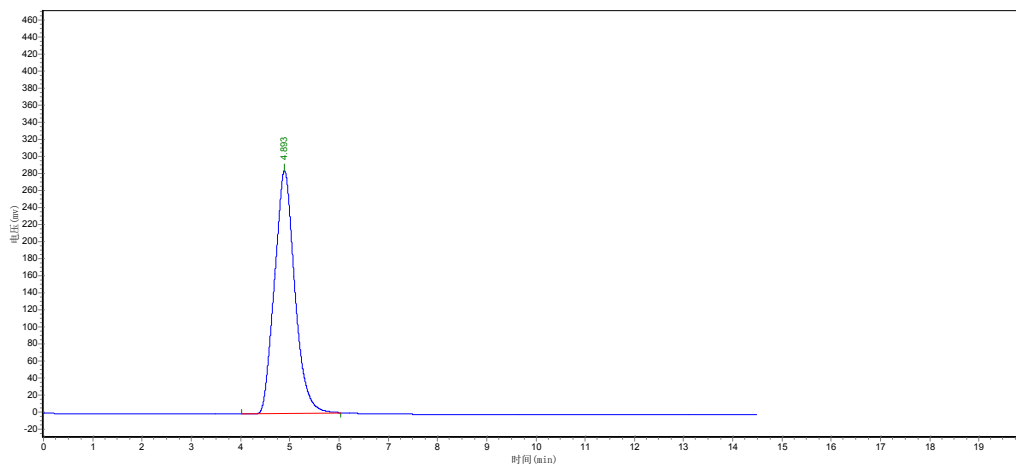

| Name   | Retention Time | Peak height | Area        | Area Percent |
|--------|----------------|-------------|-------------|--------------|
| Totals | 4.893          | 285099.375  | 8110905.000 | 100.0000     |

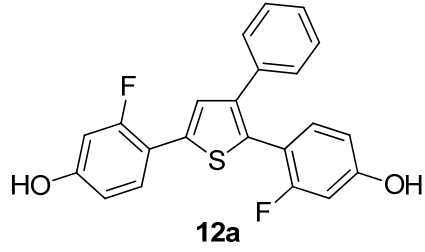

Normal Phase(Method 30:70 EtOAc:Hex, Flow rate 1.0 mL/min)

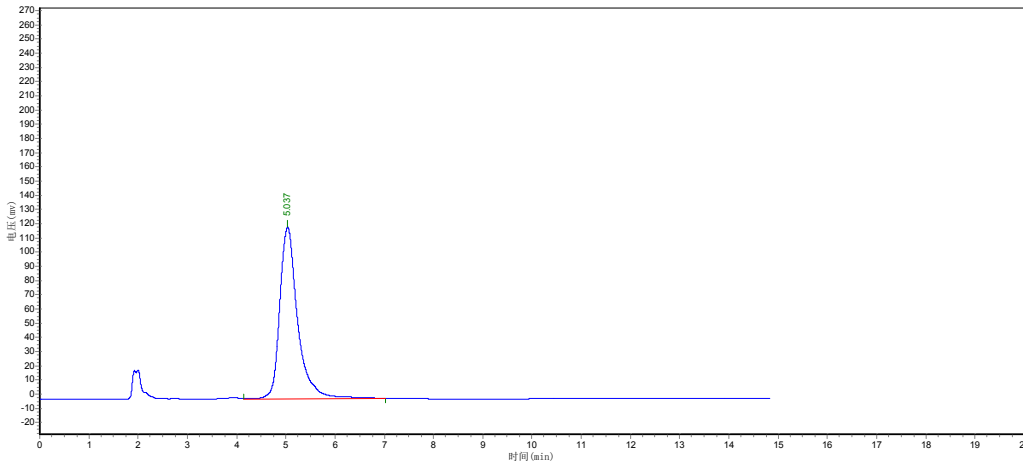

| Name   | Retention Time | Peak height | Area        | Area Percent |
|--------|----------------|-------------|-------------|--------------|
|        | 5.037          | 120751.820  | 3056137.750 | 100.0000     |
| Totals |                | 120751.820  | 3056137.750 | 100.0000     |

Reverse Phase(Method 70:30 CH<sub>3</sub>CN:H<sub>2</sub>O, Flow rate 0.7 mL/min)

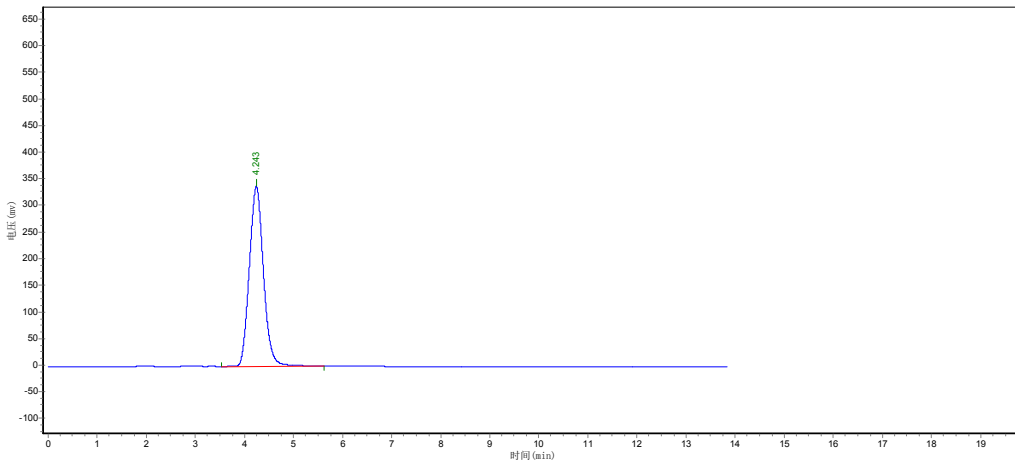

| Name   | Retention Time | Peak height | Area        | Area Percent |
|--------|----------------|-------------|-------------|--------------|
|        | 4.243          | 337712.156  | 6748891.000 | 100.0000     |
| Totals |                | 337712.156  | 6748891.000 | 100.0000     |

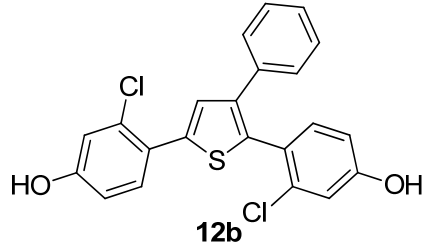

Normal Phase(Method 30:70 EtOAc:Hex, Flow rate 1.0 mL/min)

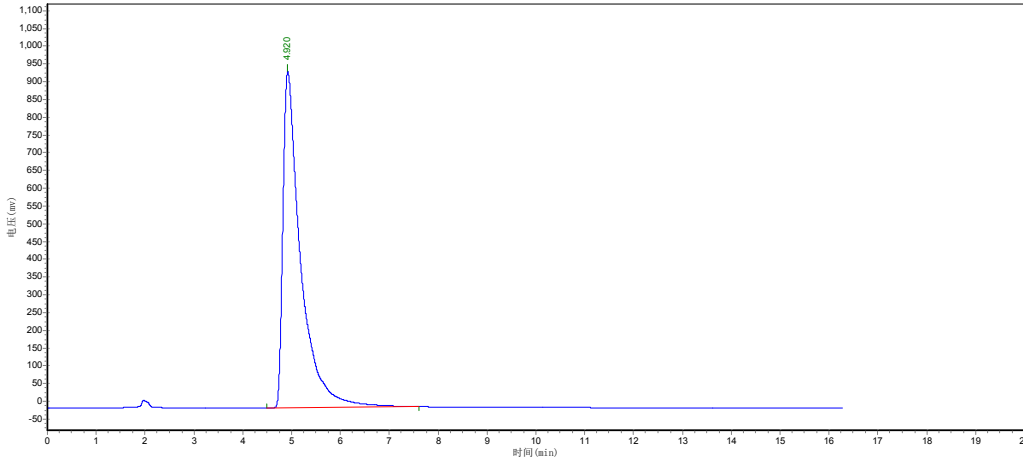

| Name   | Retention Time | Peak height | Area         | Area Percent |
|--------|----------------|-------------|--------------|--------------|
|        | 4.920          | 947742.063  | 23809662.000 | 100.0000     |
| Totals |                | 947742.063  | 23809662.000 | 100.0000     |

Reverse Phase(Method 70:30 CH<sub>3</sub>CN:H<sub>2</sub>O, Flow rate 0.7 mL/min)

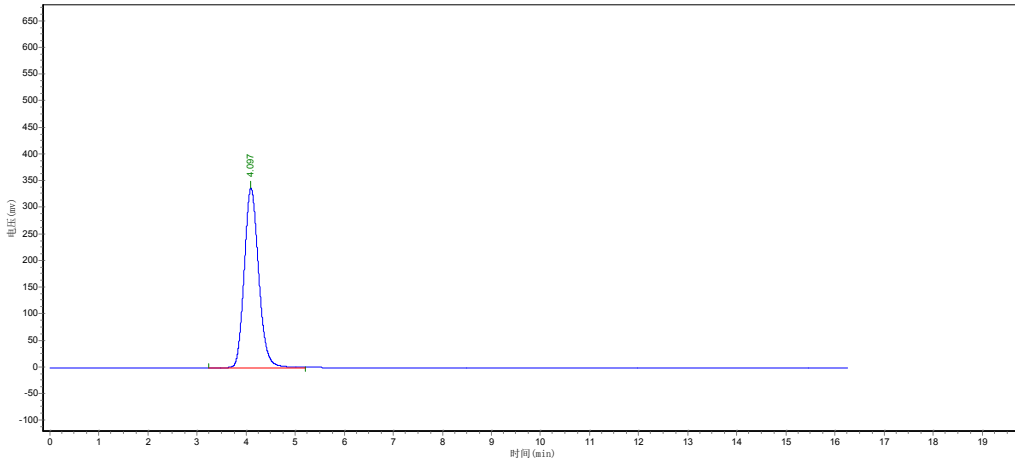

| Name   | Retention Time | Peak height | Area        | Area Percent |
|--------|----------------|-------------|-------------|--------------|
|        | 4.097          | 338044.969  | 6958047.000 | 100.0000     |
| Totals |                | 338044.969  | 6958047.000 | 100.0000     |



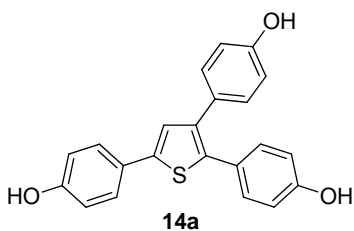

Normal Phase(Method 30:70 EtOAc:Hex, Flow rate 1.0 mL/min)

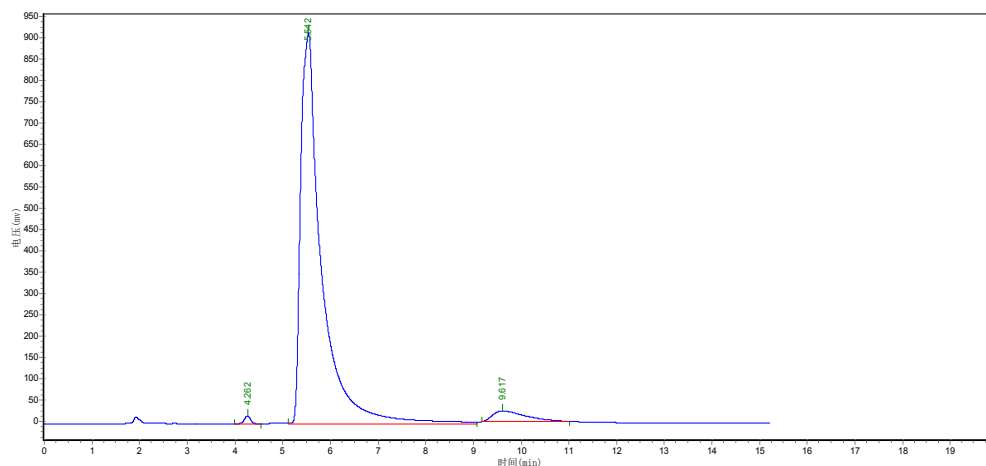

| Name   | Retention Time | Peak height | Area         | Area Percent |
|--------|----------------|-------------|--------------|--------------|
|        | 4.262          | 17894.713   | 162425.766   | 0.5575       |
|        | 5.542          | 917130.375  | 27760694.000 | 95.2782      |
|        | 9.617          | 25158.000   | 1213343.625  | 4.1643       |
| Totals |                | 960183.088  | 29136463.391 | 100.0000     |

Reverse Phase(Method 70:30 CH<sub>3</sub>CN:H<sub>2</sub>O, Flow rate 0.7 mL/min)

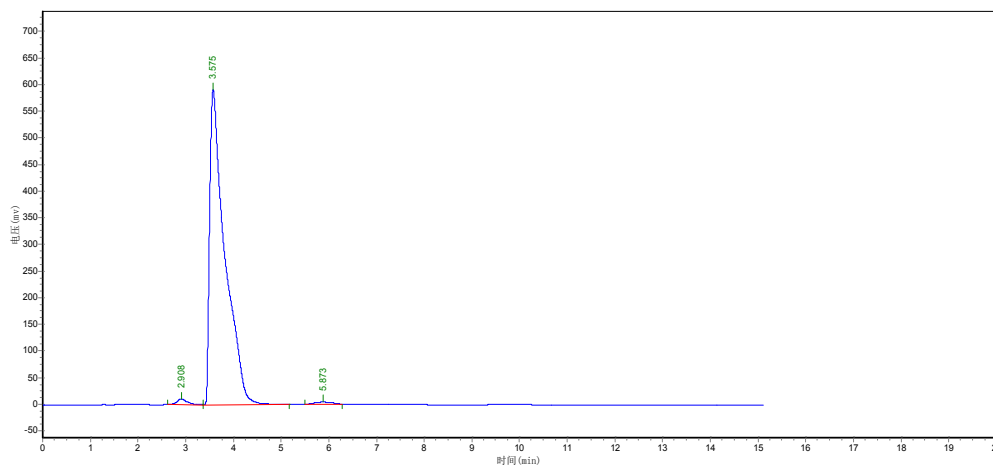

| Name   | Retention Time | Peak height | Area         | Area Percent |
|--------|----------------|-------------|--------------|--------------|
|        | 2.908          | 10464.652   | 160894.031   | 1.2025       |
|        | 3.575          | 591265.563  | 13116912.000 | 98.0363      |
|        | 5.873          | 3927.362    | 101843.500   | 0.7612       |
| Totals |                | 605657.576  | 13379649.531 | 100.0000     |

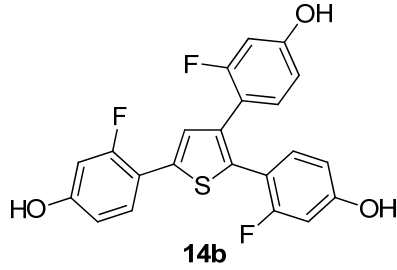

Normal Phase(Method 30:70 EtOAc:Hex, Flow rate 1.0 mL/min)

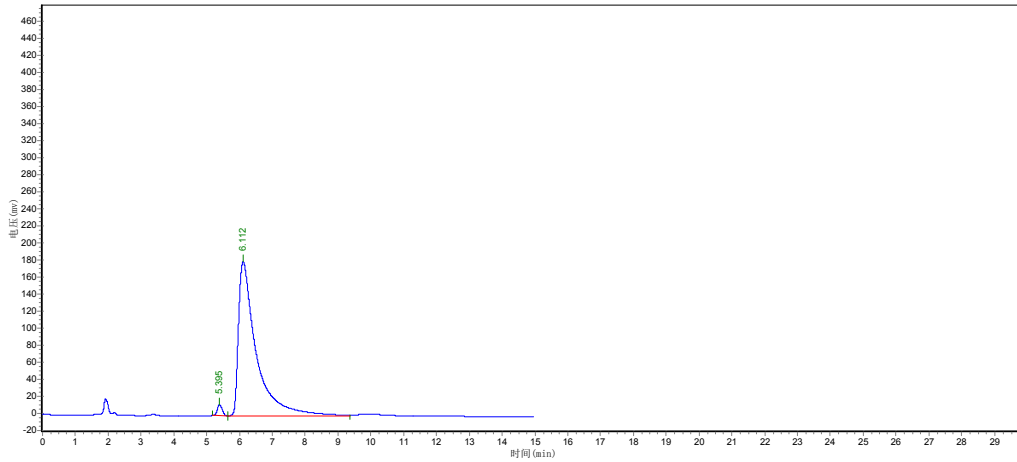

| Name   | Retention Time | Peak height | Area        | Area Percent |
|--------|----------------|-------------|-------------|--------------|
|        | 5.395          | 13006.758   | 139737.094  | 1.9780       |
|        | 6.112          | 181363.469  | 6924822.500 | 98.0220      |
| Totals |                | 194370.227  | 7064559.594 | 100.0000     |

Reverse Phase(Method 70:30 CH<sub>3</sub>CN:H<sub>2</sub>O, Flow rate 0.7 mL/min)

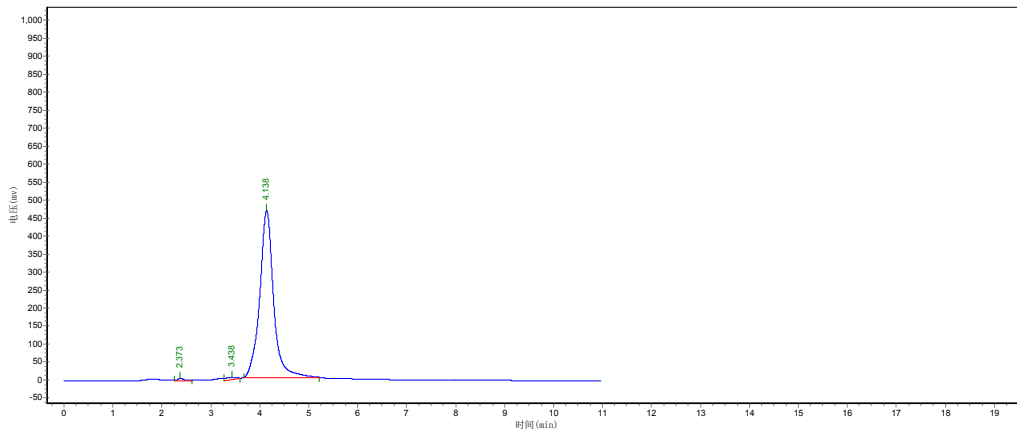

| Name   | Retention Time | Peak height | Area        | Area Percent |
|--------|----------------|-------------|-------------|--------------|
|        | 2.373          | 5894.809    | 38718.953   | 0.3921       |
|        | 3.438          | 8794.950    | 154052.578  | 1.5599       |
|        | 4.138          | 470355.875  | 9683217.000 | 98.0481      |
| Totals |                | 485045.634  | 9875988.531 | 100.0000     |

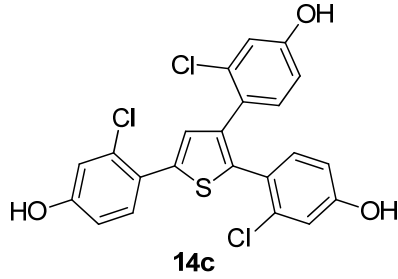

Normal Phase(Method 30:70 EtOAc:Hex, Flow rate 1.0 mL/min)

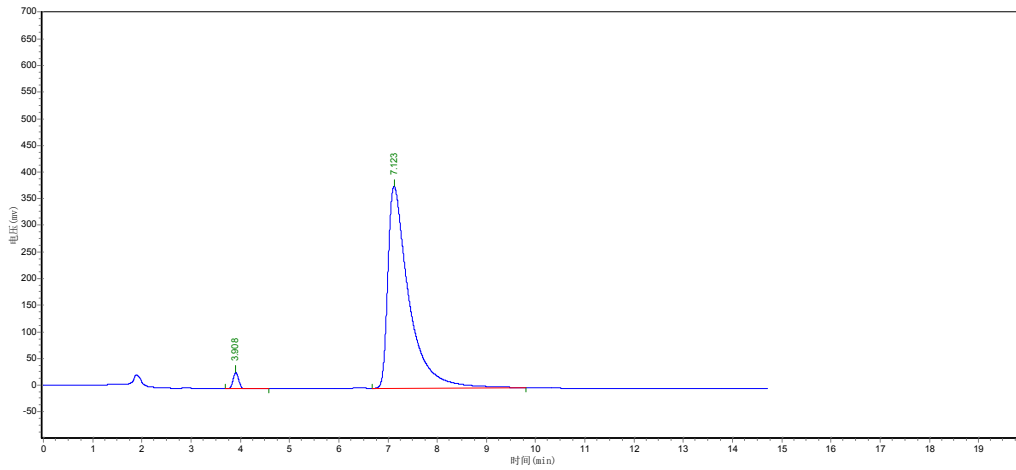

| Name   | Retention Time | Peak height | Area         | Area Percent |
|--------|----------------|-------------|--------------|--------------|
|        | 3.908          | 30094.238   | 240843.203   | 2.0811       |
|        | 7.123          | 380223.938  | 11331844.000 | 97.9189      |
| Totals |                | 410318.176  | 11572687.203 | 100.0000     |

Reverse Phase(Method 70:30 CH<sub>3</sub>CN:H<sub>2</sub>O, Flow rate 0.7 mL/min)

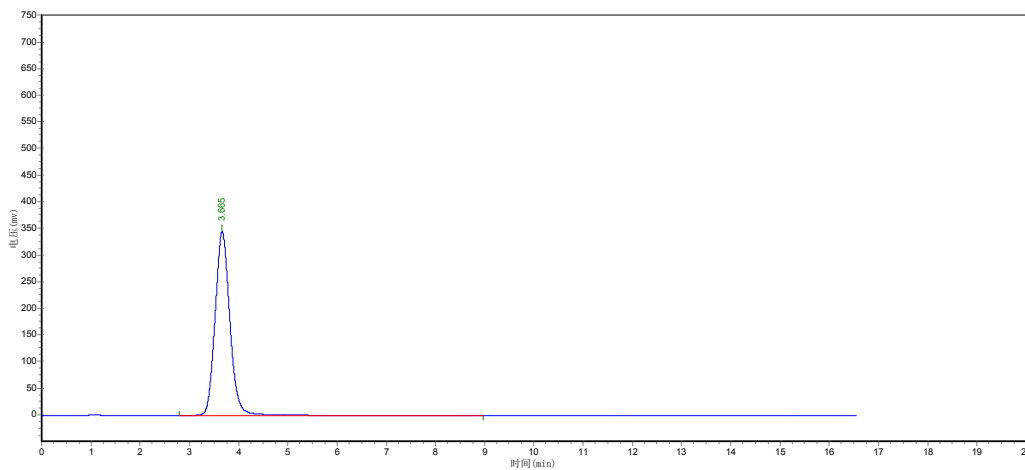

| Name   | Retention Time | Peak height | Area        | Area Percent |
|--------|----------------|-------------|-------------|--------------|
|        | 3.665          | 345578.375  | 7230601.000 | 100.0000     |
| Totals |                | 345578.375  | 7230601.000 | 100.0000     |

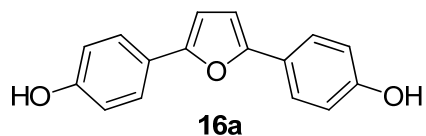

Normal Phase(Method 30:70 EtOAc:Hex, Flow rate 1.0 mL/min)

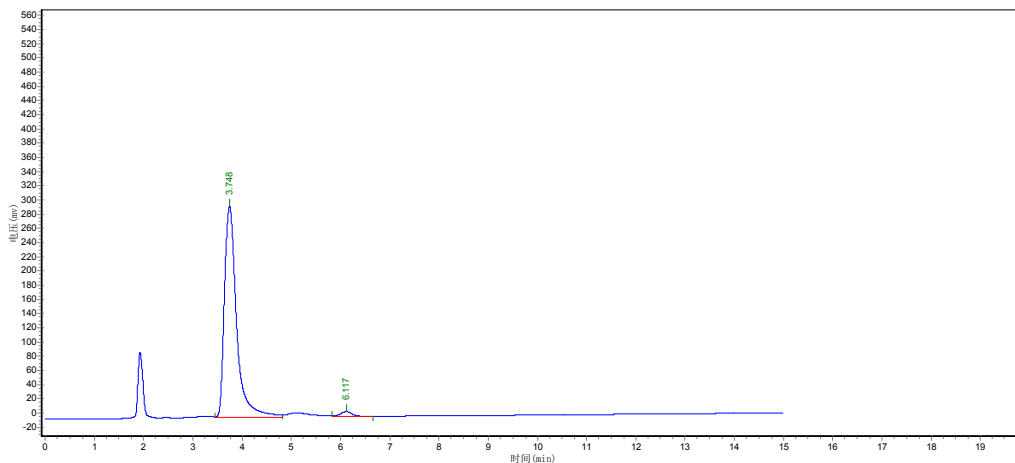

| Name          | Retention Time | Peak height       | Area              | Area Percent    |
|---------------|----------------|-------------------|-------------------|-----------------|
|               | 3.748          | 297348.281        | 5132034.500       | 97.8027         |
|               | 6.117          | 6976.034          | 115298.758        | 2.1973          |
| <b>Totals</b> |                | <b>304324.315</b> | <b>524733.258</b> | <b>100.0000</b> |

Reverse Phase(Method 70:30 CH<sub>3</sub>CN:H<sub>2</sub>O, Flow rate 0.7 mL/min)

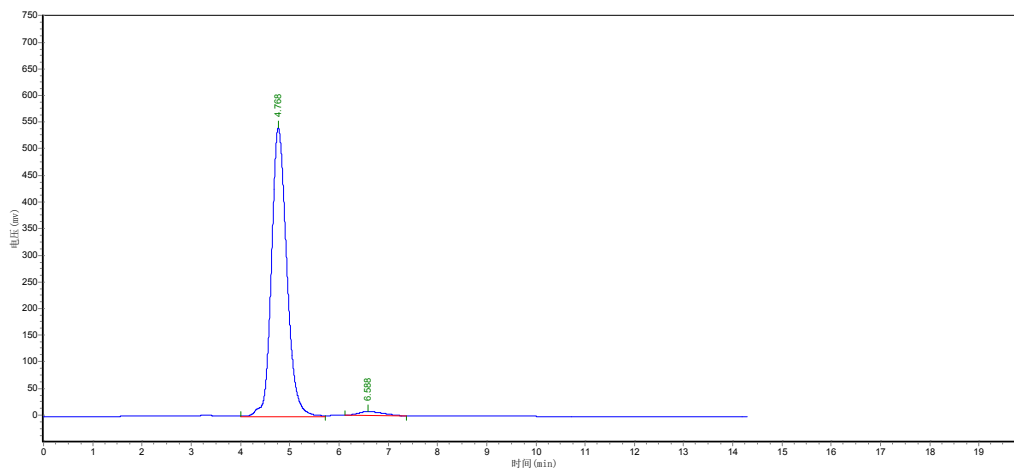

| Name          | Retention Time | Peak height       | Area                | Area Percent    |
|---------------|----------------|-------------------|---------------------|-----------------|
|               | 4.768          | 541923.813        | 11715631.000        | 97.7940         |
|               | 6.588          | 7381.860          | 264276.813          | 2.2060          |
| <b>Totals</b> |                | <b>549305.472</b> | <b>11979907.813</b> | <b>100.0000</b> |

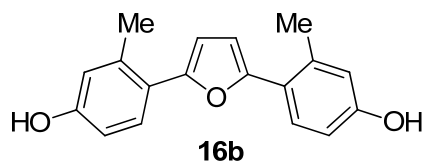

Normal Phase(Method 30:70 EtOAc:Hex, Flow rate 1.0 mL/min)

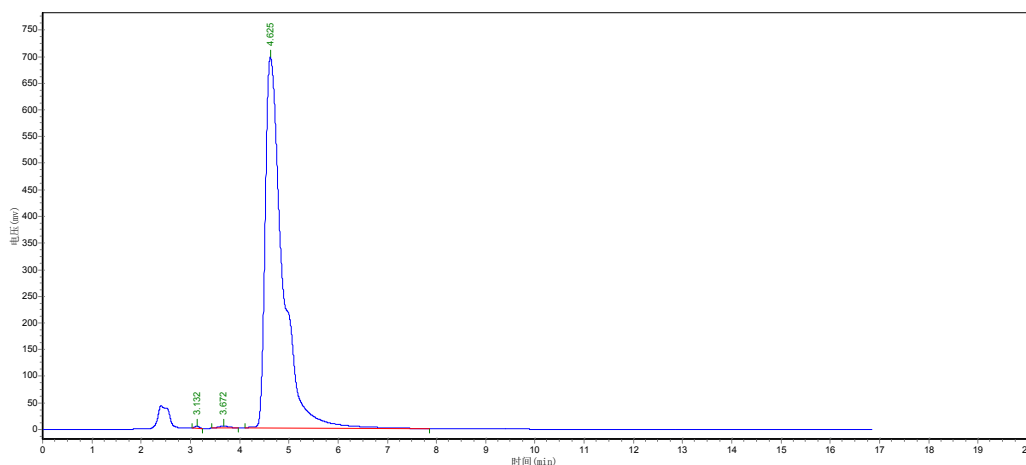

| Name   | Retention Time | Peak height | Area         | Area Percent |
|--------|----------------|-------------|--------------|--------------|
|        | 3.132          | 3222.698    | 19565.998    | 0.1140       |
|        | 3.672          | 3856.399    | 62318.195    | 0.3631       |
| Totals | 4.625          | 696100.625  | 17079162.000 | 99.5229      |
|        |                | 703179.723  | 17161046.193 | 100.0000     |

Reverse Phase(Method 70:30 CH<sub>3</sub>CN:H<sub>2</sub>O, Flow rate 0.7 mL/min)

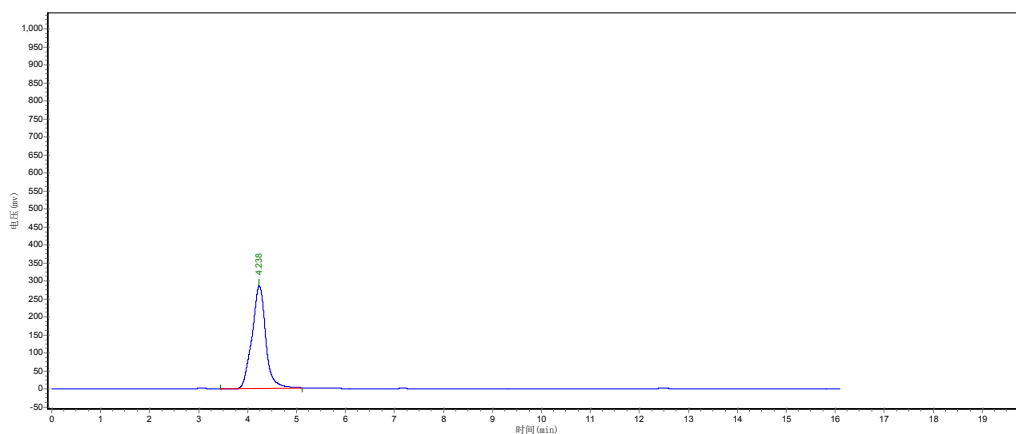

| Name   | Retention Time | Peak height | Area        | Area Percent |
|--------|----------------|-------------|-------------|--------------|
| Totals | 4.238          | 284593.156  | 5572610.000 | 100.0000     |
|        |                | 284593.156  | 5572610.000 | 100.0000     |

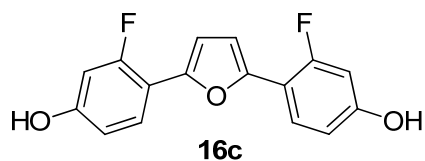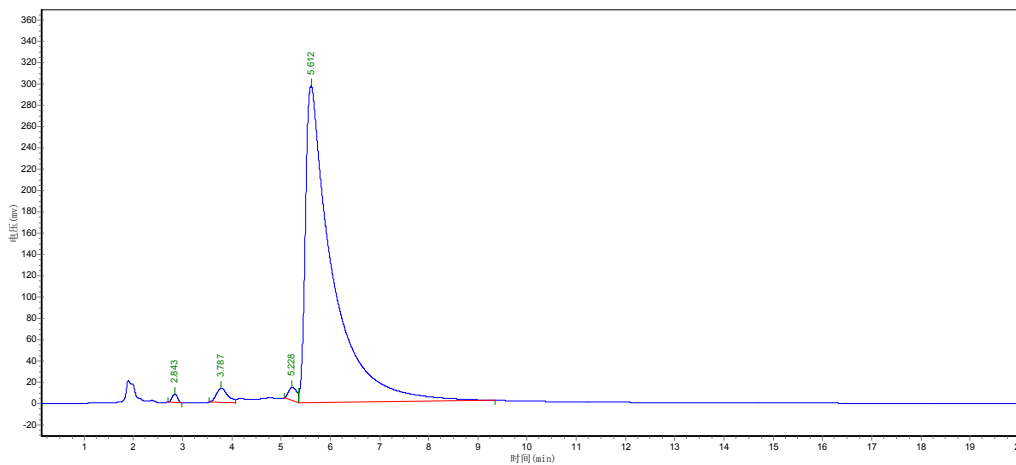

| Name          | Retention Time | Peak height       | Area                | Area Percent    |
|---------------|----------------|-------------------|---------------------|-----------------|
|               | 2.843          | 7724.186          | 59816.547           | 0.5134          |
|               | 3.787          | 13382.565         | 216484.500          | 1.8580          |
|               | 5.228          | 12258.151         | 151472.906          | 1.3000          |
|               | 5.612          | 297576.531        | 11223725.000        | 96.3286         |
| <b>Totals</b> |                | <b>330941.434</b> | <b>11651498.953</b> | <b>100.0000</b> |

Reverse Phase(Method 70:30 CH<sub>3</sub>CN:H<sub>2</sub>O, Flow rate 0.7 mL/min)

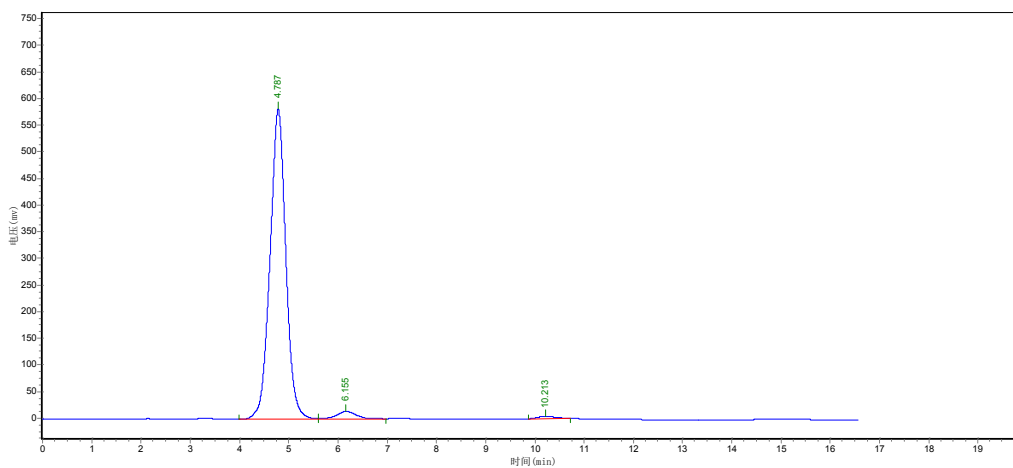

| Name          | Retention Time | Peak height       | Area                | Area Percent    |
|---------------|----------------|-------------------|---------------------|-----------------|
|               | 4.787          | 582933.125        | 13024212.000        | 95.6711         |
|               | 6.155          | 14909.532         | 477646.406          | 3.5086          |
|               | 10.213         | 4411.816          | 111668.750          | 0.8203          |
| <b>Totals</b> |                | <b>602254.474</b> | <b>13613527.156</b> | <b>100.0000</b> |

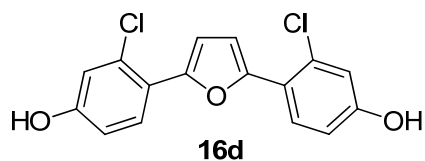

Normal Phase(Method 40:60 EtOAc:Hex, Flow rate 1.0 mL/min)

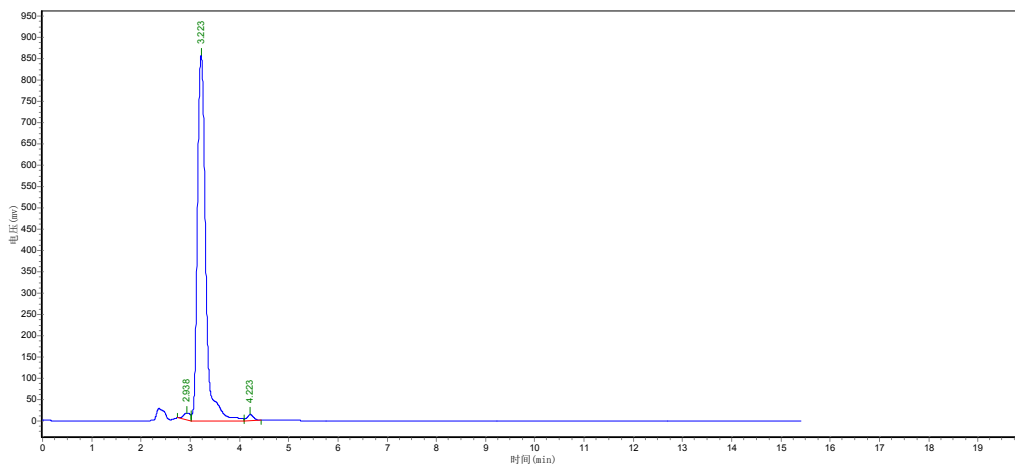

| Name          | Retention Time | Peak height       | Area                | Area Percent    |
|---------------|----------------|-------------------|---------------------|-----------------|
|               | 2.938          | 16467.893         | 157055.625          | 1.5177          |
|               | 3.223          | 857877.438        | 10060491.000        | 97.2168         |
|               | 4.223          | 14598.757         | 130963.344          | 1.2655          |
| <b>Totals</b> |                | <b>888944.088</b> | <b>10348509.969</b> | <b>100.0000</b> |

Reverse Phase(Method 70:30 CH<sub>3</sub>CN:H<sub>2</sub>O, Flow rate 0.7 mL/min)

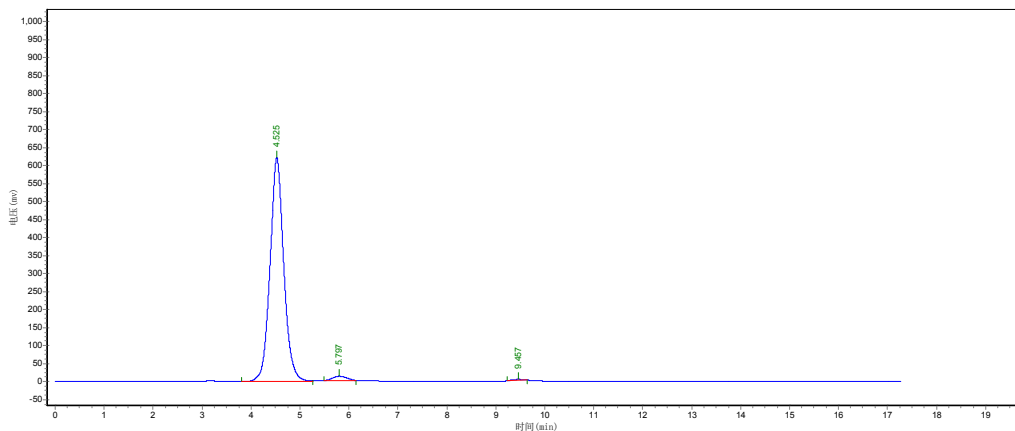

| Name          | Retention Time | Peak height       | Area                | Area Percent    |
|---------------|----------------|-------------------|---------------------|-----------------|
|               | 4.525          | 618868.375        | 11914657.000        | 96.9878         |
|               | 5.797          | 12383.794         | 274586.000          | 2.2352          |
|               | 9.457          | 4538.437          | 95459.102           | 0.7771          |
| <b>Totals</b> |                | <b>635790.606</b> | <b>12284702.102</b> | <b>100.0000</b> |

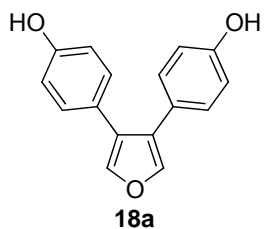

Normal Phase(Method 40:60 EtOAc:Hex, Flow rate 1.0 mL/min)

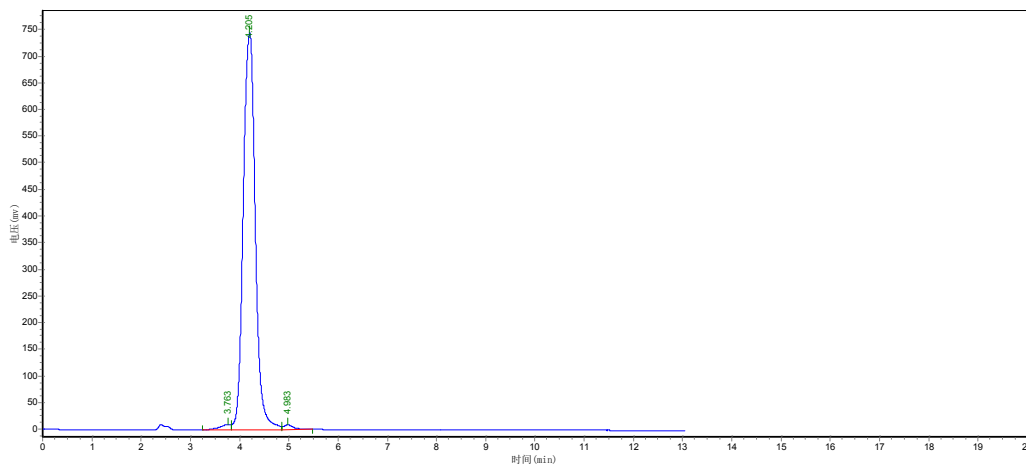

| Name          | Retention Time | Peak height       | Area                | Area Percent    |
|---------------|----------------|-------------------|---------------------|-----------------|
|               | 3.763          | 10376.232         | 165334.156          | 1.2683          |
|               | 4.205          | 746491.250        | 12732914.000        | 97.6740         |
|               | 4.983          | 9282.698          | 137889.266          | 1.0577          |
| <b>Totals</b> |                | <b>766150.181</b> | <b>13036137.422</b> | <b>100.0000</b> |

Reverse Phase(Method 70:30 CH<sub>3</sub>CN:H<sub>2</sub>O, Flow rate 0.7 mL/min)

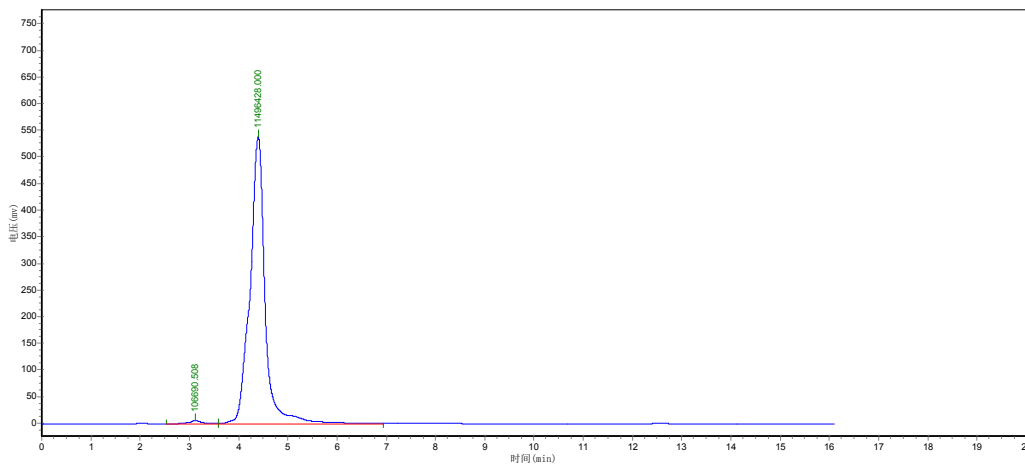

| Name          | Retention Time | Peak height       | Area                | Area Percent    |
|---------------|----------------|-------------------|---------------------|-----------------|
|               | 3.120          | 6059.301          | 106690.508          | 0.9195          |
|               | 4.398          | 538291.938        | 11496428.000        | 99.0805         |
| <b>Totals</b> |                | <b>544351.239</b> | <b>11603118.508</b> | <b>100.0000</b> |



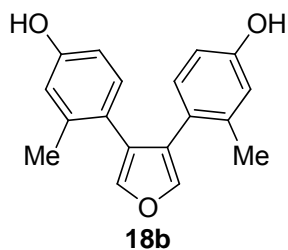

Normal Phase(Method 40:60 EtOAc:Hex, Flow rate 1.0 mL/min)

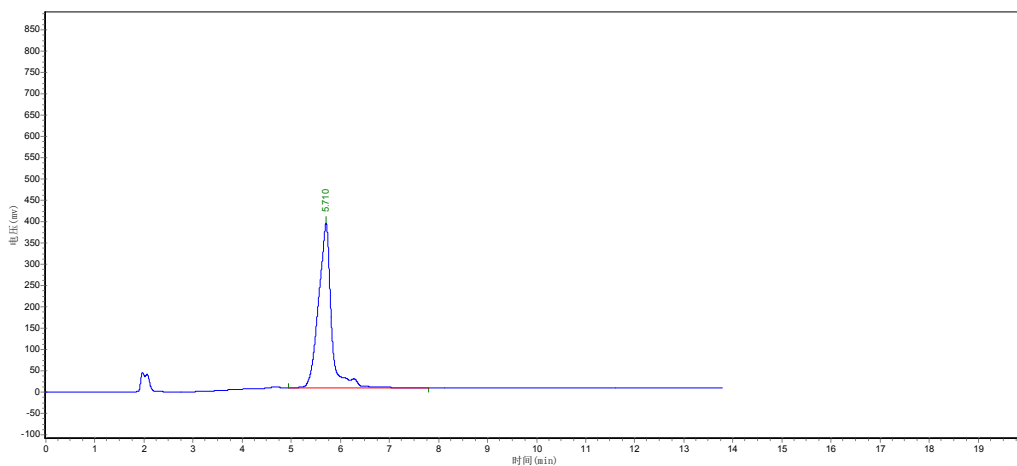

| Name   | Retention Time | Peak height | Area        | Area Percent |
|--------|----------------|-------------|-------------|--------------|
| Totals | 5.710          | 385433.750  | 6997826.500 | 100.0000     |
| Totals |                | 385433.750  | 6997826.500 | 100.0000     |

Reverse Phase(Method 70:30 CH<sub>3</sub>CN:H<sub>2</sub>O, Flow rate 0.7 mL/min)

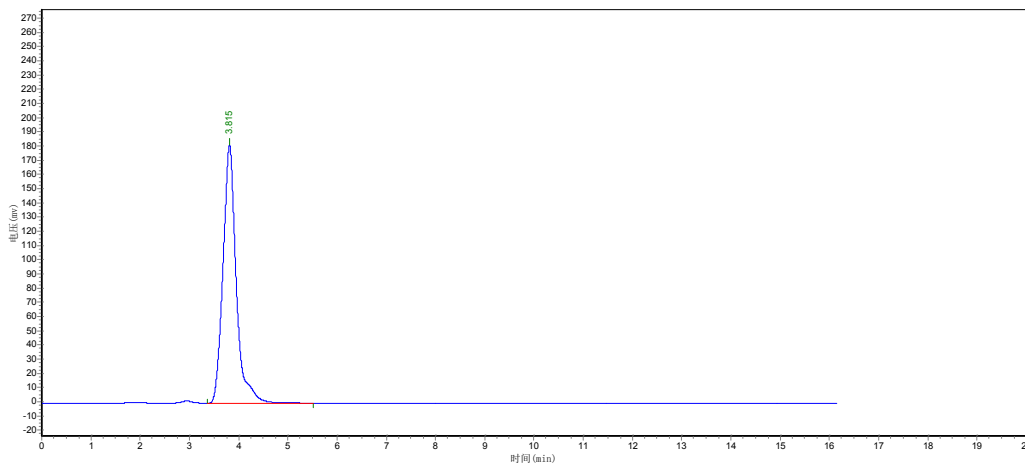

| Name   | Retention Time | Peak height | Area        | Area Percent |
|--------|----------------|-------------|-------------|--------------|
| Totals | 3.815          | 181914.578  | 3387507.500 | 100.0000     |
| Totals |                | 181914.578  | 3387507.500 | 100.0000     |

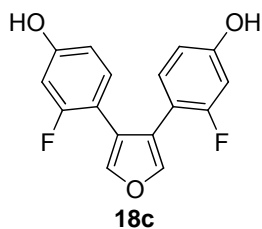

Normal Phase(Method 40:60 EtOAc:Hex, Flow rate 1.0 mL/min)

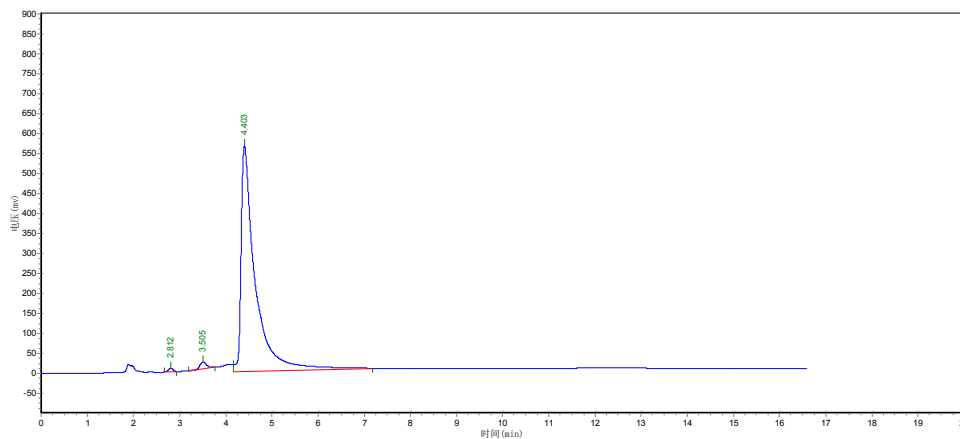

| Name   | Retention Time | Peak height | Area         | Area Percent |
|--------|----------------|-------------|--------------|--------------|
|        | 2.812          | 8764.337    | 60599.152    | 0.4982       |
|        | 3.505          | 17162.057   | 164122.375   | 1.3494       |
| Totals | 4.403          | 564933.250  | 11937716.000 | 98.1523      |
|        |                | 590859.644  | 12162437.527 | 100.0000     |

Reverse Phase(Method 70:30 CH<sub>3</sub>CN:H<sub>2</sub>O, Flow rate 0.7 mL/min)

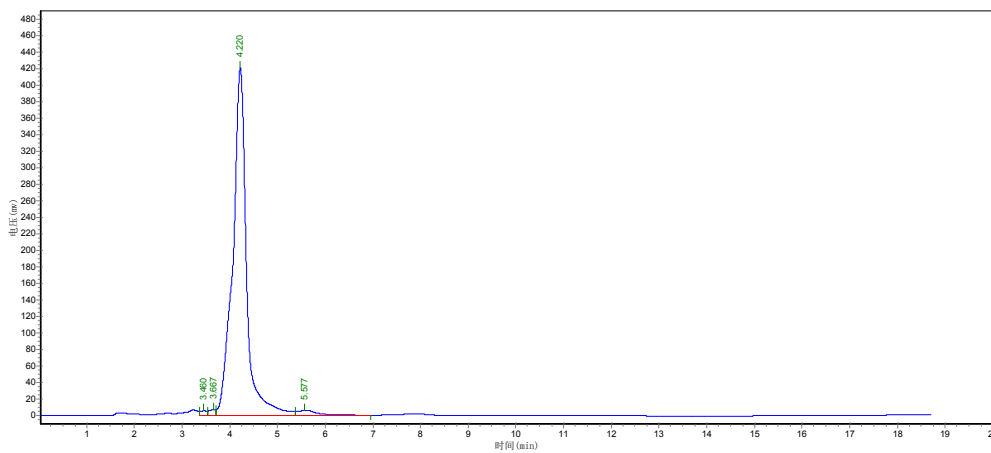

| Name   | Retention Time | Peak height | Area        | Area Percent |
|--------|----------------|-------------|-------------|--------------|
|        | 3.460          | 5615.458    | 57823.184   | 0.6586       |
|        | 3.667          | 7453.568    | 70353.234   | 0.8013       |
|        | 4.220          | 421406.906  | 8443249.000 | 96.1641      |
|        | 5.577          | 5857.371    | 208618.359  | 2.3761       |
| Totals |                | 440333.303  | 8780043.777 | 100.0000     |

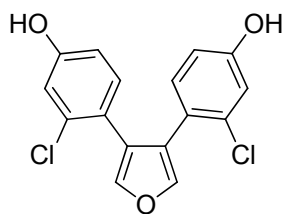

**18d**

Normal Phase(Method 40:60 EtOAc:Hex, Flow rate 1.0 mL/min)

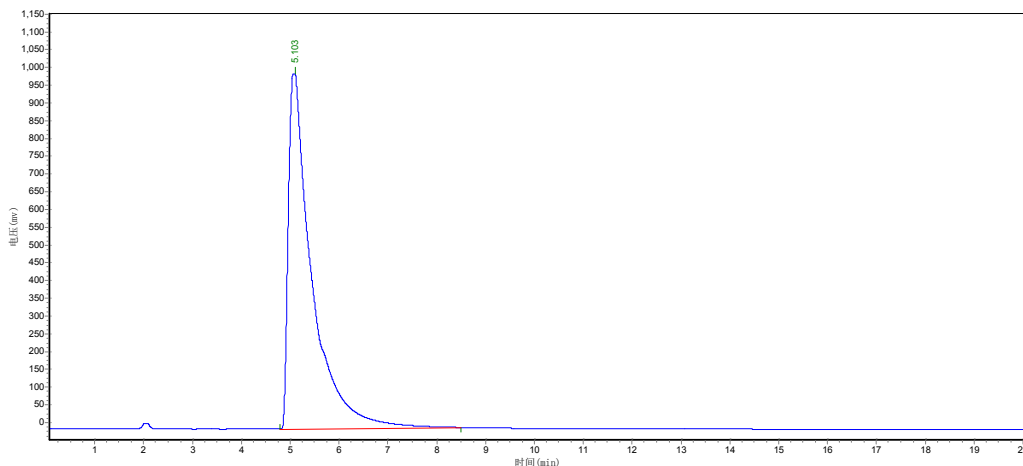

| Name   | Retention Time | Peak height | Area         | Area Percent |
|--------|----------------|-------------|--------------|--------------|
|        | 5.103          | 999067.500  | 33385538.000 | 100.0000     |
| Totals |                | 999067.500  | 33385538.000 | 100.0000     |

Reverse Phase(Method 70:30 CH<sub>3</sub>CN:H<sub>2</sub>O, Flow rate 0.7 mL/min)

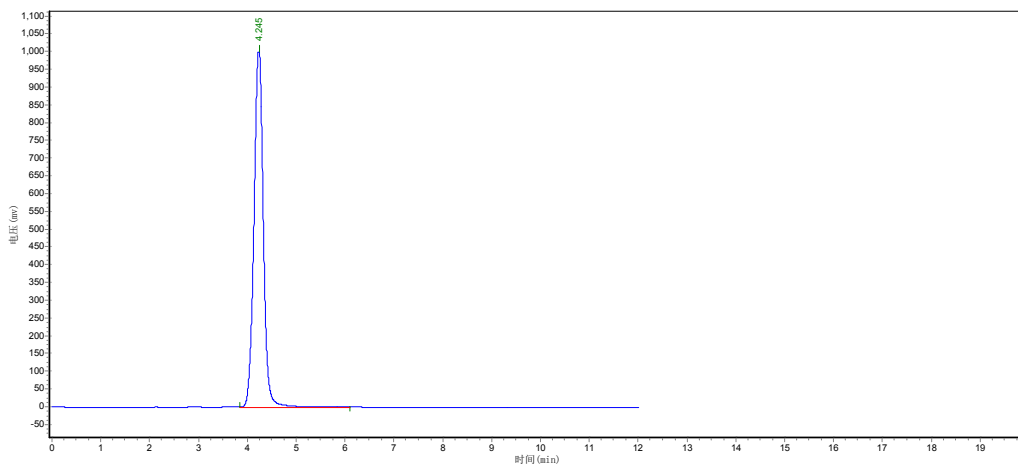

| Name   | Retention Time | Peak height | Area         | Area Percent |
|--------|----------------|-------------|--------------|--------------|
|        | 4.245          | 1001028.750 | 13450566.000 | 100.0000     |
| Totals |                | 1001028.750 | 13450566.000 | 100.0000     |

### PART III. BIOLOGICAL ASSAYS FOR COMPOUND 10a

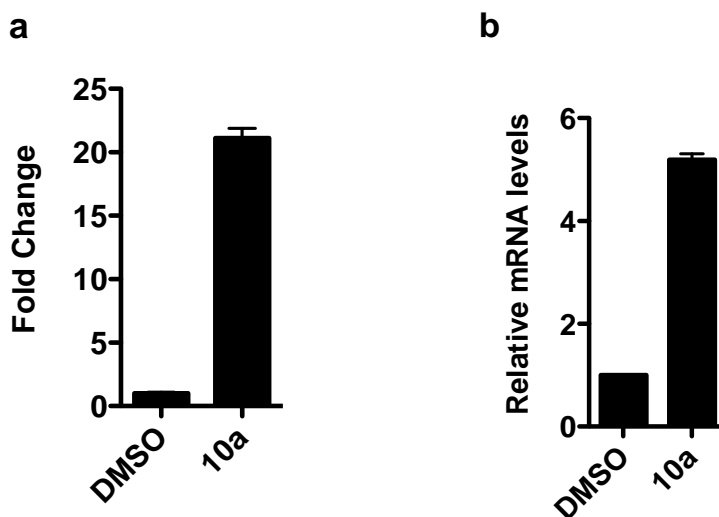

- a) Mammalian-two hybrid assay: HEK293T cells were transfected with VP16- ER $\alpha$  (bait), GAL4 SRC2 (prey) and 5X GAL4 UAS luciferase as the reporter. The next day, cells were plated at a density of 20,000 cells/well, incubated in 384-well plates overnight at 37 °C and 5% CO<sub>2</sub>, and treated with compounds dissolved in DMSO using a robotic pin-tool dispenser. Luciferase activity was measured after 24 hours using BriteLite reagent (Perkin-Elmer Inc., Shelton, CT) according to manufacturer's protocol.
- b) RT-QPCR for GREB1: Ishikawa cells were plated at a density of 20,000 cells/well in phenol red-free growth media, incubated in 384-well plates overnight at 37 °C and 5% CO<sub>2</sub>, and treated with compounds dissolved in DMSO using a robotic pin-tool dispenser. mRNA was extracted, converted to cDNA, and RT-QPCR for GREB1 was performed and normalized using GAPDH as a housekeeping gene.
